# Supplementary material for: Changes in dissolved organic matter quality in a peatland and forest headwater stream as a function of seasonality and hydrologic conditions
Source: Copernicus journal article supplement (doi:10.5194/hess-21-2035-2017), 2017-04-13
Supplement: Supplementary file 1 [file hess-21-2035-2017-supplement.zip]

Archive with 4 entries (4 files):
- data_Broder_event.csv
- supplement.pdf
- hess-21-2035-2017-supplement-title-page.pdf
- data_Broder.csv
