# Supplementary material for: Changes in dissolved organic matter quality in a peatland and forest headwater stream as a function of seasonality and hydrologic conditions
Source: Copernicus journal article supplement (doi:10.5194/hess-21-2035-2017), 2017-04-13
Supplement: Supplementary file 1 [file hess-21-2035-2017-supplement.zip › data_Broder.csv]

doy bog	DOC bog	abs 254 bog	SUVA bog	arom. % bog	SR bog	FI bog	HIX bog	C1% bog	C2% bog	C3% bog	C4% bog	C5% bog	fDOM bog	fDOM/DOC bog		Doy forest	DOC forest	abs254 forest	SUVA forest	arom. % forest	SR forest	FI forest	HIX forest	C1% forest	C2% forest	C3% forest	C4% forest	C5% forest	fDOM forest	fDOM/DOC forest		doy	water level	doy	Q	doy	P	doy	T		Abbreviations
104.50	7.85	79.66	4.40	32.34	1.78	1.54	0.85	45.36	23.49	12.91	8.40	9.85	0.63	0.08		104.50	11.22	116.55	4.51	33.04	1.98	1.67	0.86	43.22	26.01	20.95	0.03	9.79	1.00	0.09		122.76	-16.34	104.53	21.09	0.00		0.00			doy	day of the year
104.63	6.60	67.29	4.43	32.49	1.83	1.60	0.81	42.08	22.64	14.19	8.67	12.41	0.83	0.13		104.63	11.69	117.45	4.36	32.08	2.04	1.69	0.87	43.82	26.57	20.57	0.00	9.05	1.01	0.09		122.77	-15.36	104.54	27.38	0.98	12.90	0.98	1.01		DOC	DOC [mg L-1]
105.63	5.14	49.33	4.17	30.81	1.86	1.67	0.81	44.35	22.69	13.61	7.15	12.20	0.66	0.13		105.63	11.30	110.13	4.23	31.23	2.17	1.70	0.81	42.47	25.12	20.21	0.00	12.21	0.96	0.09		122.78	-15.36	104.55	28.39	1.98	0.00	1.98	-0.46		abs 254	absorbance at 254 nm [m-1]
106.63	5.04	45.46	3.92	29.17	1.88	1.58	0.76	40.73	22.16	14.60	6.46	16.05	0.62	0.12		106.63	10.15	97.00	4.15	30.68	2.04	1.67	0.84	42.91	27.05	19.71	0.00	10.32	0.85	0.08		122.79	-15.36	104.56	28.57	2.98	13.00	2.98	2.46		SUVA	abs 254/DOC [L mg C-1 m-1] after Weishaar et al. 2003
107.63	5.01	49.33	4.28	31.53	1.81	1.66	0.91	46.61	25.75	14.85	3.77	9.02	0.66	0.13		107.63		113.31			1.97	1.66	0.89	43.94	28.25	19.79	0.00	8.02	1.00			122.80	-15.36	104.56	29.23	3.98	4.30	3.98	4.74		arom. %	aromaticity calculated after Weishaar et al. 2003
122.50	17.83	183.50	4.47	32.76	1.74	1.53	0.91	43.06	27.29	12.69	9.92	7.04	1.17	0.07		108.63		127.82			1.96	1.64	0.89	43.45	27.76	19.94	0.00	8.85	1.08			122.81	-15.36	104.57	30.64	4.98	20.60	4.98	3.54		SR	spectral slope ratio after Helms et al. 2008
136.63	26.22	278.43	4.61	33.70	1.76	1.61	0.95	44.74	28.66	13.49	9.11	4.00	0.87	0.03		122.50	17.37	168.51	4.21	31.09	1.72	1.55	0.93	43.10	27.49	13.89	9.56	5.97	1.25	0.07		122.82	-15.36	104.58	32.25	5.98	5.30	5.98	2.52		FI	fluorescence index after Cory and McKnight 2005
136.79	26.77	290.32	4.71	34.33	1.74	1.55	0.92	43.38	27.98	13.40	9.72	5.52	0.91	0.03		122.63		209.48			1.73											122.83	-15.36	104.58	33.75	6.98	1.80	6.98	1.57		HIX	humification index after Ohno 2002
136.96	26.43	285.48	4.69	34.21	1.73	1.54	0.92	43.53	28.21	13.62	9.40	5.24	0.87	0.03		123.63		226.06	5.06	36.61	1.72											122.84	-15.36	104.59	34.09	7.98	2.60	7.98	1.86		C1%	PARAFAC component 1 in percent
137.13	25.82	259.92	4.37	32.13	1.71	1.65	0.90	42.20	27.00	14.00	10.63	6.18	0.82	0.03		124.63	19.41	229.19	4.92	35.72	1.73											122.85	-15.36	104.60	33.90	8.98	5.60	8.98	1.65		C2%	PARAFAC component 2 in percent
137.29	25.60	267.38	4.54	33.20	1.72	1.60	0.91	42.88	26.79	14.08	10.35	5.90	0.84	0.03		125.63	20.22	236.20			1.72											122.86	-15.36	104.60	33.75	9.98	0.60	9.98	-1.61		C3%	PARAFAC component 3 in percent
137.46	24.61	259.23	4.57	33.45	1.72	1.56	0.91	42.63	28.13	14.70	9.10	5.44	0.80	0.03		130.63		272.31			1.71											122.88	-15.36	104.61	33.56	10.98	0.00	10.98	-6.45		C4%	PARAFAC component 4 in percent
137.63	23.00	245.41	4.63	33.84	1.70	1.62	0.90	43.63	26.82	14.28	8.83	6.44	0.81	0.04		131.63		268.16	5.17	37.32	1.72											122.89	-15.36	104.62	33.37	11.98	6.30	11.98	-8.20		C5%	PARAFAC component 5 in percent
137.79	23.61	236.29	4.35	31.96	1.71	1.66	0.88	42.90	26.11	14.23	9.12	7.65	0.79	0.03		132.63	22.54	262.27			1.73											122.90	-15.36	104.63	33.37	12.98	0.00	12.98	-7.50		fDOM	sum of all fluorescent components (absolute values)
137.96	21.85					1.63	0.95	44.63	27.99	14.95	8.48	3.95	0.75	0.03		133.63		298.38			1.75											122.91	-15.36	104.63	33.18	13.98	0.00	13.98	-9.14		fDOM/DOC	fDOM normalized to DOC concentration
138.13	23.05	224.96	4.24	31.27	1.83											136.63	25.90	308.97	5.18	37.40	1.75	1.59	0.91	42.70	29.05	14.64	7.32	6.29	0.92	0.04		122.92	-15.36	104.64	33.18	14.98	0.30	14.98	-8.66		water level	bog water level
138.29	22.70	239.05	4.57	33.45	1.85											136.79	26.53	311.32	5.09	36.85	1.75	1.62	0.92	43.38	29.37	14.99	7.06	5.20	0.93	0.03		122.93	-15.36	104.65	33.18	15.98	0.00	15.98	-7.10		Q	discharge at the bog outlet [L s-1]
138.46	22.74	239.19	4.57	33.41	1.87											136.96	26.33															122.94	-15.36	104.65	32.99	16.98	0.00	16.98	-6.90		P	precipitation [mm]
138.63	23.23	241.26	4.51	33.03	1.90	1.63	0.93	45.60	26.44	13.56	8.65	5.74	0.81	0.04		137.13	29.18	310.91	4.63	33.79	1.79	1.65	0.86	41.81	27.07	15.94	6.52	8.66	0.95	0.03		122.95	-15.36	104.66	32.62	17.98	0.00	17.98	-7.89		T	temperature [�C]
146.79	10.54	110.27	4.54	33.24	1.74	1.57	0.76	39.95	23.86	14.24	7.48	14.47	1.32	0.13		137.29	31.73	336.47	4.60	33.65	1.77	1.60	0.94	43.43	29.63	17.52	4.84	4.58	0.96	0.03		122.96	-15.36	104.67	32.43	18.98	0.00	18.98	-11.58
146.92	10.61	94.98	3.89	28.98	1.70											137.46	29.63	341.44	5.00	36.26	1.77	1.59	0.91	42.52	28.90	16.99	5.53	6.06	0.97	0.03		122.97	-15.36	104.67	32.43	19.98	0.00	19.98	-10.22
147.04	10.91	93.73	3.73	27.94	1.69											137.63	28.16	312.01	4.81	35.00	1.78	1.66	0.92	42.35	28.94	16.99	6.39	5.34	0.95	0.03		122.98	-15.36	104.68	32.43	20.98	0.00	20.98	-9.30
147.17	11.17	104.79	4.07	30.18	1.68											137.79	29.19	323.89	4.82	35.04	1.82	1.60	0.94	43.80	29.59	18.55	3.46	4.60	1.00	0.03		122.99	-15.36	104.69	32.25	21.98	0.00	21.98	-8.81
147.29	11.38	116.76	4.46	32.68	1.69											137.96	29.08	317.68	4.74	34.55	1.85	1.64	0.93	44.13	29.02	19.07	2.73	5.05	1.01	0.03		123.00	-15.36	104.69	32.25	22.98	0.00	22.98	-7.63
147.42	11.65	127.63	4.76	34.65	1.71	1.52	0.84	41.60	26.31	14.42	7.93	9.74	1.34	0.12		138.13	27.62	309.94	4.87	35.40	1.85											123.01	-15.36	104.70	32.25	23.98	0.00	23.98	-8.13
147.54	11.36	129.80	4.96	35.97	1.73	1.55	0.85	42.49	25.71	13.92	8.56	9.32	1.43	0.13		138.29	26.70	306.48	4.98	36.13	1.86	1.64	0.90	42.73	28.82	19.64	2.72	6.09	0.98	0.04		123.02	-15.36	104.71	33.37	24.98	0.00	24.98	-10.05
147.67	11.50	133.44	5.04	36.48	1.71											138.46	25.76	306.62	5.17	37.33	1.86											123.03	-15.36	104.72	34.67	25.98	1.80	25.98	-9.26
147.79	11.86	138.50	5.07	36.69	1.72											138.63	25.38	290.04	4.96	35.98	1.88	1.63	0.90	42.52	28.66	18.72	3.41	6.69	0.98	0.04		123.04	-15.36	104.72	36.44	26.98	0.00	26.98	-4.27
147.92	12.16	139.88	4.99	36.20	1.71											138.79	25.82	297.64	5.01	36.27	1.84											123.05	-15.36	104.73	39.21	27.98	0.00	27.98	-0.99
148.04	12.46	144.04	5.02	36.37	1.67											138.96	25.93	299.02	5.01	36.28	1.85											123.06	-15.36	104.74	41.76	28.98	26.50	28.98	1.29
148.17	12.15	143.32	5.12	37.03	1.68	1.47	0.85	42.50	26.25	14.13	8.44	8.67	1.21	0.10		139.13	25.79	295.15	4.97	36.03	1.83											123.07	-15.36	104.74	42.59	29.98	24.70	29.98	4.76
148.29	13.03	152.44	5.08	36.75	1.65											139.29	23.57	272.49	5.02	36.36	1.78											123.08	-15.36	104.75	43.91	30.98	0.40	30.98	0.69
148.42	13.00	152.55	5.09	36.84	1.66											139.46	25.94	297.50	4.98	36.10	1.79											123.09	-15.36	104.76	45.22	31.98	7.10	31.98	0.10
148.54	13.38	156.75	5.09	36.80	1.66											139.63	27.17	315.60	5.04	36.52	1.79											123.10	-15.36	104.76	44.13	32.98	0.00	32.98	-2.69
148.67	13.16	155.81	5.14	37.15	1.69											139.79	26.55	316.57	5.18	37.39	1.79											123.11	-15.36	104.77	44.99	33.98	0.00	33.98	-3.21
148.79	13.54	160.51	5.15	37.18	1.68											139.96	26.93	317.40	5.12	36.99	1.77											123.13	-15.36	104.78	46.59	34.98	0.00	34.98	-0.27
148.92	14.52	174.52	5.22	37.66	1.64											140.13	26.88	314.08	5.07	36.71	1.76											123.14	-15.36	104.78	46.59	35.98	0.00	35.98	-2.16
149.04	13.80	164.64	5.18	37.41	1.64											140.29	26.23	306.35	5.07	36.70	1.75											123.15	-15.36	104.79	46.59	36.98	0.30	36.98	-4.41
149.17	13.98	166.78	5.18	37.40	1.65											140.46	26.48	305.79	5.01	36.32	1.79											123.16	-15.36	104.80	46.59	37.98	0.00	37.98	-4.57
149.29	13.95	167.34	5.21	37.60	1.65											146.79	20.51	237.49	5.03	36.42	1.91											123.17	-15.36	104.81	46.59	38.98	0.00	38.98	-6.12
149.42	13.96	165.95	5.16	37.30	1.66											146.92	20.79	243.57	5.09	36.79	1.89											123.18	-15.36	104.81	46.59	39.98	0.00	39.98	-6.71
149.54	14.01	168.37	5.22	37.65	1.67											147.04	21.00	248.36	5.14	37.12	1.88											123.19	-15.36	104.82	46.59	40.98	0.00	40.98	-7.38
150.04	18.44	203.12	4.78	34.82	1.60	1.55	0.86	42.44	28.02	13.52	7.81	8.21	0.88	0.05		147.17	20.91	244.76	5.08	36.77	1.88											123.20	-15.36	104.83	47.05	41.98	0.00	41.98	-8.21
150.17	17.25	182.77	4.60	33.63	1.58	1.58	0.88	40.80	30.15	14.33	7.24	7.49	0.79	0.05		147.29	20.97	242.92	5.03	36.42	1.86											123.21	-15.36	104.83	47.05	42.98	0.00	42.98	-7.14
150.29	12.67	132.84	4.55	33.32	1.63	1.57	0.89	42.54	28.76	15.63	5.96	7.11	0.65	0.05		147.42	20.69	240.71	5.05	36.56	1.87											123.22	-15.36	104.84	46.82	43.98	3.10	43.98	-7.63
150.42	11.39	118.90	4.53	33.19	1.70	1.56	0.84	41.74	26.08	14.31	7.87	10.00	0.85	0.07		147.54	20.71	239.42	5.02	36.36	1.89											123.23	-15.36	104.85	46.82	44.98	0.00	44.98	-8.57
150.54	10.10	111.10	4.77	34.76	1.69	1.56	0.84	41.28	26.76	14.80	7.52	9.65	0.81	0.08		147.67	21.67	237.76	4.76	34.69	1.87											123.24	-15.36	104.85	46.82	45.98	3.90	45.98	-3.75
150.67	10.44	115.59	4.81	34.98	1.72	1.57	0.84	42.93	25.84	14.88	6.59	9.76	0.85	0.08		147.79	21.06	241.63	4.98	36.12	1.85											123.25	-15.36	104.86	46.82	46.98	0.00	46.98	-0.88
150.79	10.71	123.60	5.01	36.31	1.71	1.69	0.84	42.94	25.86	14.77	6.91	9.52	0.88	0.08		147.92	20.46	238.78	5.07	36.67	1.85											123.26	-15.36	104.87	46.59	47.98	0.00	47.98	-2.09
150.92	9.40	102.18	4.72	34.41	1.70	1.59	0.84	41.90	26.14	16.61	5.58	9.76	0.76	0.08		148.04	21.03	233.62	4.82	35.08	1.83											123.27	-15.36	104.88	46.59	48.98	0.00	48.98	-4.13
151.04	11.85	117.94	4.32	31.80	1.66	1.57	0.82	41.01	27.15	15.36	5.74	10.74	0.82	0.07		148.17	17.91	209.94	5.09	36.82	1.81											123.28	-15.36	104.88	44.81	49.98	0.00	49.98	-4.21
151.17	12.01	125.40	4.53	33.20	1.67	1.57	0.83	41.64	26.89	14.59	6.82	10.05	0.87	0.07		148.29	18.01	208.84	5.03	36.45	1.78											123.29	-15.36	104.89	43.91	50.98	0.00	50.98	-6.82
151.29	12.34	128.02	4.51	33.01	1.67											148.42	19.12	221.73	5.04	36.47	1.78											123.30	-15.36	104.90	43.02	51.98	0.00	51.98	-7.93
151.42	12.74	132.45	4.52	33.07	1.64											148.54	20.65	232.51	4.89	35.50	1.76											123.31	-15.36	104.90	42.15	52.98	0.00	52.98	-9.43
151.54	12.75	134.52	4.58	33.50	1.66	1.53	0.86	42.15	28.29	15.00	6.26	8.29	0.89	0.07		148.67	18.99	226.06	5.17	37.33	1.77											123.32	-15.36	104.91	42.15	53.98	0.00	53.98	-8.74
151.67	13.11	138.04	4.57	33.43	1.67											148.79	18.57	222.84	5.21	37.60	1.75											123.33	-15.36	104.92	41.98	54.98	0.00	54.98	-4.68
151.79	13.12	140.32	4.64	33.91	1.65											148.92	18.35	222.56	5.27	37.96	1.74											123.34	-15.36	104.92	42.59	55.98	0.00	55.98	-1.86
151.92	13.43	142.74	4.61	33.72	1.66											149.04	18.98	231.87	5.30	38.22	1.72											123.35	-15.36	104.93	42.59	56.98	0.00	56.98	-1.03
152.04	13.38	145.37	4.72	34.39	1.65	1.54	0.84	42.04	27.40	14.56	6.86	9.14	0.94	0.07		149.17	19.77	234.17	5.14	37.17	1.72											123.36	-15.36	104.94	42.37	57.98	0.00	57.98	-4.03
152.17	13.73	149.65	4.73	34.48	1.65											149.29	19.35	234.81	5.27	37.98	1.72											123.38	-15.36	104.94	42.37	58.98	0.00	58.98	-3.31
152.29	13.89	151.24	4.73	34.46	1.64											149.42	19.33	236.20	5.30	38.22	1.73											123.39	-15.36	104.95	42.37	59.98	0.00	59.98	-3.30
152.42	14.31	153.24	4.65	33.94	1.66	1.54	0.87	43.46	27.32	14.40	6.58	8.24	0.99	0.07		149.50	19.41	231.77	5.15	37.21	1.73											123.40	-15.36	104.96	41.33	60.98	0.00	60.98	-4.03
152.54	14.53	153.59	4.59	33.56	1.67											149.79	18.92	225.23	5.17	37.33	1.73											123.41	-15.36	104.97	41.11	61.98	0.00	61.98	-3.07
156.63	17.49	209.30	5.20	37.52	1.76	1.58	0.90	44.39	26.55	13.32	9.55	6.19	1.03	0.06		149.92	19.25	232.42	5.24	37.81	1.72											123.42	-15.36	104.97	40.90	62.98	0.00	62.98	-1.48
162.63	22.40	245.50	4.76	34.66	1.73	1.57	0.90	42.87	28.22	13.27	9.78	5.86	1.11	0.05		150.04	18.85	228.37	5.26	37.92	1.68	1.57	0.94	42.59	30.33	15.80	5.71	5.58	0.98	0.05		123.43	-15.36	104.98	41.11	63.98	0.00	63.98	3.19
165.63	24.98	266.23	4.63	33.80	1.76	1.54	0.91	43.14	27.50	13.31	10.53	5.52	1.20	0.05		150.17	17.98	227.26	5.49	39.42	1.69	1.60	0.94	43.12	30.22	15.72	5.44	5.50	0.96	0.05		123.44	-15.36	104.99	40.90	64.98	0.10	64.98	2.97
178.75	28.49	282.72	4.31	31.72	1.84											150.29	18.32	216.57	5.13	37.11	1.77	1.62	0.95	43.37	30.96	18.26	2.16	5.25	0.89	0.05		123.45	-15.36	104.99	40.90	65.98	1.50	65.98	3.03
180.63	26.41	290.41	4.77	34.76	1.84	1.62	0.92	43.81	26.08	14.20	10.52	5.38	1.16	0.04		150.42	17.89	203.49	4.94	35.83	1.84	1.62	0.87	41.55	29.72	18.60	2.34	7.78	0.95	0.05		123.46	-15.36	105.00	40.05	66.98	0.40	66.98	-0.18
183.63		281.77			1.81											150.54	18.01	208.28	5.02	36.36	1.86	1.62	0.90	42.48	30.56	19.33	0.67	6.97	0.98	0.05		123.47	-15.36	105.01	39.84	67.98	6.00	67.98	-0.36
186.63	27.74	301.12	4.71	34.36	1.78	1.52	0.93	43.98	26.87	13.21	11.19	4.75	1.19	0.04		150.67	21.25	241.17	4.93	35.75	1.86	1.59	0.91	42.78	30.37	20.12	0.20	6.52	1.21	0.06		123.48	-15.36	105.01	39.21	68.98	2.10	68.98	-2.56
189.63		258.05			1.83											150.79	21.27	249.37	5.09	36.82	1.87	1.60	0.93	43.06	31.31	20.45	0.00	5.18	1.20	0.06		123.49	-15.36	105.02	38.84	69.98	0.00	69.98	-9.67
192.63	28.78	293.63	4.43	32.51	1.83	1.54	0.92	43.08	27.19	11.98	12.62	5.13	1.19	0.04		150.92	18.62	209.94	4.90	35.55	1.87	1.54	0.90	42.58	30.67	19.89	0.07	6.80	1.04	0.06		123.50	-15.36	105.03	38.42	70.98	0.00	70.98	-9.60
203.58	36.60	384.14	4.56	33.34	1.80											151.04	19.57	222.01	4.93	35.75	1.88	1.60	0.89	41.83	30.13	20.28	0.00	7.76	1.11	0.06		123.51	-15.36	105.03	37.61	71.98	3.50	71.98	-8.86
236.79	32.45	331.08	4.43	32.51	2.00											151.17	21.68	236.93	4.75	34.58	1.87	1.68	0.94	42.46	31.47	20.08	0.00	5.99	1.14	0.05		123.52	-15.36	105.04	37.00	72.98	0.20	72.98	-7.09
237.63	33.16	311.04	4.07	30.18	1.91	1.60	0.93	44.66	24.47	13.93	12.34	4.60	1.21	0.04		151.29	20.97	250.20	5.18	37.41	1.86											123.53	-15.36	105.05	36.60	73.98	0.00	73.98	-10.82
243.63	32.98	309.94	4.08	30.24	1.93	1.52	0.93	44.97	24.74	12.25	13.46	4.59	1.19	0.04		151.42	21.17	247.89	5.09	36.78	1.86											123.54	-15.36	105.06	36.44	74.98	0.00	74.98	-5.74
250.58	34.50	332.60	4.19	30.92	1.93											151.54	21.71	255.63	5.11	36.96	1.86	1.62	0.89	42.01	30.67	19.82	0.00	7.50	1.23	0.06		123.55	-15.36	105.06	35.84	75.98	0.00	75.98	-3.48
250.63	33.49	343.38	4.45	32.65	1.94	1.57	0.93	45.89	24.74	12.65	12.00	4.71	1.19	0.04		151.67	22.16	261.71	5.13	37.07	1.86											123.56	-15.36	105.07	35.25	76.98	0.00	76.98	-1.46
250.75	33.52	332.32	4.30	31.70	1.95	1.55	0.93	46.02	24.76	12.11	12.77	4.34	1.15	0.03		151.79	22.71	265.95	5.08	36.78	1.86											123.57	-15.36	105.08	34.87	77.98	0.00	77.98	-4.99
250.88	33.01	350.29	4.61	33.67	1.93	1.63	0.93	45.96	25.05	12.51	12.17	4.31	1.19	0.04		151.92	22.92	270.92	5.13	37.10	1.85											123.58	-15.36	105.08	34.09	78.98	0.00	78.98	-4.45
251.00	33.20	339.23	4.44	32.55	1.92	1.61	0.93	45.63	24.86	12.30	12.48	4.73	1.20	0.04		152.04	22.37	266.78	5.18	37.39	1.85	1.64	0.87	41.35	30.11	20.50	0.00	8.04	1.28	0.06		123.59	-15.36	105.09	33.90	79.98	0.00	79.98	-5.67
251.13	32.43	319.75	4.28	31.54	1.95	1.57	0.94	45.38	24.94	12.20	13.50	3.99	1.16	0.04		152.17	22.46	270.37	5.23	37.71	1.82											123.60	-15.36	105.10	33.18	80.98	0.00	80.98	-6.86
251.25	30.15	288.66	4.16	30.73	1.86	1.63	0.92	43.93	26.47	13.02	11.86	4.71	1.03	0.03		152.29	22.72	271.20	5.18	37.43	1.83											123.61	-15.36	105.10	32.99	81.98	0.00	81.98	-10.84
251.38	34.04	349.32	4.46	32.68	1.85	1.60	0.92	44.09	26.11	14.13	10.69	4.98	1.15	0.03		152.42	23.13	280.87	5.27	38.01	1.83	1.68	0.89	41.91	31.20	19.78	0.60	6.50	1.31	0.06		123.63	-15.36	105.11	32.43	82.98	0.00	82.98	-10.99
251.50	36.81	348.49	4.11	30.43	1.88	1.58	0.92	43.88	25.90	14.42	11.00	4.80	1.21	0.03		152.54	22.85	279.40	5.31	38.24	1.83											123.64	-15.36	105.12	31.88	83.98	0.00	83.98	-8.97
251.88	34.85	337.44	4.20	31.05	1.93	1.68	0.93	44.71	25.35	14.42	11.19	4.34	1.19	0.03		156.50	20.17	222.29	4.78	34.83	1.72											123.65	-15.36	105.13	31.37	84.98	0.00	84.98	-7.69
252.00	34.64	337.57	4.23	31.22	1.91	1.67	0.93	45.61	24.19	14.76	11.73	3.71	1.18	0.03		156.63		260.70			1.72	1.55	0.92	42.76	30.39	15.65	5.88	5.31	1.08			123.66	-15.36	105.13	30.82	85.98	0.00	85.98	-6.84
252.13	36.90	332.74	3.92	29.16	1.87	1.67	0.93	45.84	24.23	13.98	11.90	4.05	1.20	0.03		162.50																123.67	-15.36	105.14	30.46	86.98	0.00	86.98	-6.20
252.25	35.34	335.78	4.13	30.53	1.84	1.63	0.94	45.32	25.29	14.69	10.91	3.80	1.19	0.03		162.63	24.72	297.43	5.22	37.69	1.77	1.60	0.94	42.37	30.45	14.55	8.44	4.18	1.03	0.04		123.68	-15.36	105.15	29.93	87.98	0.00	87.98	-5.13
252.38	37.29	364.52	4.24	31.30	1.82	1.68	0.94	45.12	24.77	14.39	11.74	3.98	1.23	0.03		165.63		237.44			1.75	1.51	0.93	41.80	29.91	13.80	10.46	4.02	0.92			123.69	-15.36	105.15	29.58	88.98	0.00	88.98	-5.07
252.50	37.30	335.09	3.90	29.06	1.85	1.63	0.93	44.56	25.24	14.85	11.64	3.71	1.22	0.03		168.63	27.00	258.97	4.16	30.78	1.75											123.70	-15.36	105.16	28.91	89.98	0.00	89.98	-5.78
252.63	35.53	366.32	4.48	32.82	1.89	1.66	0.94	45.43	24.36	14.55	11.68	3.97	1.21	0.03		171.63		276.13			1.74											123.71	-16.34	105.17	28.57	90.98	0.00	90.98	-4.77
252.75	34.29	339.51	4.30	31.66	1.88	1.72	0.93	45.90	24.58	14.70	10.78	4.03	1.20	0.03		174.63	30.15	299.85	4.32	31.78	1.77											123.72	-15.36	105.17	28.22	91.98	0.00	91.98	-6.79
252.88	33.15	316.16	4.14	30.63	1.81	1.61	0.93	44.94	25.07	15.25	10.42	4.33	1.14	0.03		177.63		342.57			1.79											123.73	-16.34	105.18	27.88	92.98	0.00	92.98	-5.25
254.67	25.80															178.75	28.89	311.37	4.68	34.14	1.83											123.74	-16.34	105.19	27.38	93.98	0.00	93.98	-4.34
255.63	27.61	252.04	3.96	29.47	1.86	1.60	0.92	45.19	23.64	13.83	12.11	5.23	0.99	0.04		180.63	31.63	344.18	4.73	34.44	1.83	1.66	0.93	42.42	27.70	15.93	8.92	5.03	1.26	0.04		123.75	-16.34	105.19	27.04	94.98	0.00	94.98	-3.76
258.63	26.54	250.52	4.10	30.35	1.74	1.61	0.92	44.10	26.25	14.78	10.18	4.69	0.94	0.04		183.63		305.15			1.81											123.76	-16.34	105.20	26.58	95.98	0.00	95.98	-3.69
264.63	27.58	224.13	3.53	26.63	1.77	1.57	0.91	42.75	23.90	14.33	11.47	7.56	0.99	0.04		186.63	30.77	345.33	4.87	35.41	1.80	1.57	0.92	43.26	28.16	15.48	8.32	4.78	1.27	0.04		123.77	-16.34	105.21	26.25	96.98	0.00	96.98	-3.70
270.63	29.83	273.32	3.98	29.57	1.83	1.55	0.91	44.94	25.47	13.14	11.47	4.99	1.02	0.03		189.63		319.20			1.81											123.78	-16.34	105.22	25.92	97.98	0.00	97.98	-2.12
288.63	24.10	244.99	4.42	32.42	1.79	1.68	0.93	44.32	26.13	14.95	10.32	4.29	0.80	0.03		192.63	32.81	282.23	3.74	27.98	1.81	1.63	0.95	43.12	28.98	14.33	10.19	3.38	1.15	0.04		123.79	-16.34	105.22	25.44	98.98	0.10	98.98	0.47
294.63	25.50	253.15	4.31	31.73	1.78	1.57	0.93	44.27	26.58	14.42	10.74	4.00	0.86	0.03		195.63		343.15			1.76											123.80	-16.34	105.23	24.96	99.98	0.10	99.98	2.28
300.63	25.80	267.65	4.50	33.00	1.73	1.59	0.92	44.15	26.47	15.13	9.55	4.70	0.84	0.03		198.63	33.76	329.21	4.23	31.24	1.77	1.65	0.95	44.18	28.84	16.79	6.34	3.84	1.27	0.04		123.81	-16.34	105.24	24.64	100.98	0.00	100.98	3.96
309.63	14.64	145.64	4.32	31.80	1.67											207.63	32.14	300.66	4.06	30.12	1.92	1.62	0.94	45.55	26.46	16.76	6.64	4.60	1.38	0.04		123.82	-16.34	105.24	24.36	101.98	1.40	101.98	3.83
310.50	13.88	133.11	4.17	30.79	1.75											210.63	36.89	354.20	4.17	30.81	1.89											123.83	-16.34	105.25	24.20	102.98	4.80	102.98	3.04
312.63	14.42	158.35	4.77	34.72	1.67											213.63	37.26	338.96	3.95	29.39	1.89	1.62	0.95	44.73	27.10	16.86	8.03	3.28	1.28	0.03		123.84	-16.34	105.26	23.89	103.98	0.00	103.98	6.23
315.63	16.32	178.80	4.76	34.65	1.70											216.63	35.20	364.80	4.50	32.97	1.87									0.00		123.85	-16.34	105.26	23.58	104.98	0.30	104.98	11.83
327.58	15.93	130.86	3.57	26.89	1.85											219.63	34.68	303.44	3.80	28.40	1.88	1.58	0.93	43.76	26.57	13.53	11.82	4.32	1.18	0.03		123.86	-16.34	105.27	23.28	105.98	2.50	105.98	8.38
																222.63	32.98	326.24	4.30	31.64	1.88											123.88	-16.34	105.28	23.13	106.98	0.00	106.98	9.26
																225.63	40.35	404.04	4.35	31.98	1.96	1.60	0.92	43.90	26.96	17.58	6.82	4.75	1.36	0.03		123.89	-16.34	105.28	22.82	107.98	0.00	107.98	11.67
																228.63	36.15	343.52	4.13	30.53	1.95	1.65	0.93	43.90	26.98	16.32	8.48	4.33	1.20	0.03		123.90	-16.34	105.29	22.55	108.98	0.00	108.98	5.36
																236.79	33.71	335.09	4.32	31.77	1.96									0.00		123.91	-16.34	105.30	22.26	109.98	0.00	109.98	2.02
																237.63	35.51	349.04	4.27	31.46	1.94	1.68	0.92	44.88	25.46	15.63	8.83	5.20	1.28	0.04		123.92	-16.34	105.31	21.96	110.98	0.00	110.98	5.10
																240.63																123.93	-16.34	105.31	21.67	111.98	0.00	111.98	5.39
																243.63	33.95	327.35	4.19	30.93	1.90	1.75	0.92	44.95	25.04	13.26	11.64	5.11	1.20	0.04		123.94	-16.34	105.32	21.52	112.98	0.00	112.98	6.12
																249.63	35.40	357.89	4.39	32.25	1.94											123.95	-16.34	105.33	21.09	113.98	0.00	113.98	9.51
																250.63	38.16	362.45	4.12	30.52	1.99	1.73	0.92	44.11	26.71	20.59	3.54	5.06	1.32	0.03		123.96	-16.34	105.33	20.94	114.98	0.00	114.98	12.62
																250.75	35.38	349.73	4.29	31.62	1.90	1.66	0.93	45.76	25.14	13.56	10.86	4.68	1.25	0.04		123.97	-16.34	105.34	20.55	115.98	11.40	115.98	11.20
																250.88	34.71	350.29	4.38	32.20	1.90	1.62	0.92	44.76	25.31	13.26	10.99	5.68	1.24	0.04		123.98	-16.34	105.35	20.13	116.98	8.30	116.98	0.83
																251.00	33.52	342.96	4.44	32.60	1.90	1.61	0.93	45.44	25.93	13.90	10.26	4.47	1.21	0.04		123.99	-16.34	105.35	19.71	117.98	0.60	117.98	2.70
																251.13	33.85	336.74	4.32	31.79	1.92	1.64	0.93	44.89	26.00	13.62	10.58	4.91	1.18	0.03		124.00	-16.34	105.36	19.16	118.98	0.00	118.98	4.77
																251.25	33.99	347.66	4.44	32.59	1.90	1.70	0.92	45.46	25.51	13.61	10.48	4.93	1.22	0.04		124.01	-16.34	105.37	18.65	119.98	0.00	119.98	4.36
																251.38	32.16	284.37	3.84	28.66	1.93	1.65	0.93	44.31	25.74	13.36	11.89	4.69	1.08	0.03		124.02	-16.34	105.38	17.99	120.98	0.00	120.98	5.69
																251.50	33.18	295.71	3.87	28.86	1.80	1.68	0.91	43.00	25.64	13.59	12.95	4.82	1.14	0.03		124.03	-16.34	105.38	17.35	121.98	0.00	121.98	6.36
																251.63	39.38	392.15	4.32	31.82	1.84	1.69	0.91	43.00	26.43	15.85	8.95	5.77	1.34	0.03		124.04	-16.34	105.39	16.86	122.98	0.00	122.98	7.90
																251.75	42.80	386.21	3.92	29.18	1.89	1.59	0.92	41.66	27.03	17.08	9.44	4.79	1.33	0.03		124.05	-16.34	105.40	16.61	123.98	0.00	123.98	7.99
																251.88	44.11	399.20	3.93	29.25	1.89	1.65	0.92	42.61	26.94	18.38	7.48	4.59	1.37	0.03		124.06	-16.34	105.40	16.37	124.98	0.00	124.98	9.76
																252.00	43.42	413.43	4.13	30.59	1.91	1.64	0.92	42.11	27.02	18.45	7.37	5.04	1.36	0.03		124.07	-16.34	105.41	16.12	125.98	0.00	125.98	11.27
																252.13	42.83	444.02	4.50	32.98	1.91	1.64	0.93	43.96	27.69	18.69	5.39	4.28	1.01	0.02		124.08	-16.34	105.42	15.88	126.98	1.20	126.98	11.10
																252.25	42.06	422.09	4.36	32.04	1.91	1.67	0.94	43.49	28.04	18.70	5.82	3.95	0.98	0.02		124.09	-16.34	105.42	15.64	127.98	0.00	127.98	13.61
																252.38	38.43	390.59	4.41	32.41	1.88	1.64	0.96	44.98	27.51	17.01	7.23	3.28	0.92	0.02		124.10	-16.34	105.43	15.52	128.98	2.70	128.98	12.15
																252.50	42.56	395.19	4.03	29.92	1.87	1.59	0.93	42.95	28.03	17.15	7.37	4.50	0.99	0.02		124.11	-16.34	105.44	15.42	129.98	0.00	129.98	9.55
																252.63	45.80	488.79	4.63	33.84	1.90	1.68	0.93	43.12	27.89	18.45	5.65	4.89	1.09	0.02		124.13	-16.34	105.44	15.30	130.98	0.70	130.98	7.06
																252.75	44.17	430.38	4.23	31.22	1.93	1.69	0.93	43.07	27.48	18.61	6.63	4.21	1.06	0.02		124.14	-16.34	105.45	15.07	131.98	6.40	131.98	4.25
																252.88	41.61	421.54	4.40	32.31	1.86											124.15	-16.34	105.46	15.07	132.98	3.90	132.98	4.57
																253.00	41.25	295.71	3.11	23.93	1.85											124.16	-16.34	105.47	14.83	133.98	2.60	133.98	6.56
																253.13	43.41	464.28	4.64	33.91	1.91											124.17	-16.34	105.47	14.72	134.98	4.00	134.98	12.47
																253.25	40.68	358.90	3.83	28.61	1.88											124.18	-16.34	105.48	14.49	135.98	0.60	135.98	12.92
																253.38	37.14	376.40	4.40	32.32	1.89											124.19	-16.34	105.49	14.37	136.98	1.00	136.98	14.46
																253.50	37.87	342.50	3.93	29.24	1.94											124.20	-16.34	105.49	14.26	137.98	21.10	137.98	6.96
																254.67	35.42	358.72	4.40	32.30	1.95											124.21	-16.34	105.50	14.15	138.98	0.00	138.98	10.46
																255.63	34.71	366.32	4.58	33.51	1.89											124.22	-16.34	105.51	14.15	139.98	5.20	139.98	7.73
																258.63	38.10	417.86	4.76	34.68	1.83											124.23	-16.34	105.51	14.15	140.98	0.00	140.98	7.35
																264.63	32.55	355.77	4.75	34.57	1.84											124.24	-16.34	105.52	14.15	141.98	18.80	141.98	3.85
																270.63	32.87	390.22	5.16	37.24	1.87											124.25	-16.34	105.53	14.15	142.98	6.10	142.98	2.12
																276.63	30.30	260.88	3.74	28.01	1.80											124.26	-16.34	105.53	14.26	143.98	8.10	143.98	2.23
																282.63	40.21	318.00	3.43	26.02	1.88											124.27	-16.34	105.54	14.26	144.98	4.10	144.98	3.67
																285.63	31.78	434.25	5.93	42.31	1.83											124.28	-16.34	105.55	14.37	145.98	15.10	145.98	4.92
																288.63	32.30	340.06	4.57	33.44	1.85	1.64	0.92	43.52	27.91	17.62	6.18	4.78	1.05	0.03		124.29	-16.34	105.56	14.49	146.98	17.10	146.98	5.18
																294.63	28.29	318.92	4.90	35.55	1.80	1.61	0.92	43.59	28.04	16.30	7.34	4.74	0.98	0.03		124.30	-16.34	105.56	14.49	147.98	15.30	147.98	8.39
																300.63	33.73	394.37	5.08	36.73	1.77	1.61	0.92	42.13	28.82	17.76	6.18	5.11	1.09	0.03		124.31	-16.34	105.57	14.37	148.98	10.30	148.98	8.30
																306.63	35.59	323.48	3.95	29.36	1.91	1.64	0.92	44.57	27.23	20.96	0.93	6.31	1.13	0.03		124.32	-16.34	105.58	14.26	149.98	4.80	149.98	7.31
																309.50	20.30	215.28	4.61	33.65	1.92											124.33	-16.34	105.58	14.26	150.99	3.00	150.99	10.05
																																124.34	-16.34	105.59	14.49	151.99	1.80	151.99	8.97
																																124.35	-16.34	105.60	14.49	152.99	1.00	152.99	5.10
																																124.36	-16.34	105.60	14.72	153.99	0.80	153.99	6.41
																																124.38	-16.34	105.61	14.83	154.99	0.80	154.99	9.32
																																124.39	-16.34	105.62	15.07	155.99	0.80	155.99	11.09
																																124.40	-16.34	105.63	15.52	156.99	0.70	156.99	11.83
																																124.41	-16.34	105.63	16.12	157.99	0.60	157.99	12.93
																																124.42	-16.34	105.64	17.99	158.99	0.50	158.99	13.55
																																124.43	-16.34	105.65	19.85	159.99	0.50	159.99	12.82
																																124.44	-16.34	105.65	21.23	160.99	0.50	160.99	10.89
																																124.45	-16.34	105.66	22.11	161.99	0.40	161.99	10.58
																																124.46	-16.34	105.67	22.67	162.96	6.90	162.99	13.48
																																124.47	-16.34	105.67	23.28	163.96	0.90	163.99	15.53
																																124.48	-16.34	105.68	23.74	164.96	2.70	164.99	9.34
																																124.49	-16.34	105.69	24.05	165.96	3.00	165.99	11.04
																																124.50	-16.34	105.69	24.80	166.96	0.00	166.99	11.01
																																124.51	-16.34	105.70	25.28	167.96	0.10	167.99	15.43
																																124.52	-16.34	105.71	25.60	168.96	0.00	168.99	20.86
																																124.53	-16.34	105.72	25.76	169.96	0.00	169.99	23.35
																																124.54	-16.34	105.72	25.92	170.96	1.90	170.99	20.68
																																124.55	-16.34	105.73	26.08	171.96	0.20	171.99	14.44
																																124.56	-16.34	105.74	26.25	172.96	0.00	172.99	14.19
																																124.57	-17.31	105.74	26.25	173.96	5.40	173.99	11.35
																																124.58	-17.31	105.75	26.08	174.96	1.90	174.99	9.91
																																124.59	-17.31	105.76	26.08	175.96	3.90	175.99	7.12
																																124.60	-17.31	105.76	26.08	176.96	0.00	176.99	6.13
																																124.61	-17.31	105.77	26.08	177.96	0.00	177.99	7.32
																																124.63	-17.31	105.78	25.76	178.96	2.20	178.99	8.14
																																124.64	-17.31	105.78	25.28	179.96	10.90	179.99	8.47
																																124.65	-17.31	105.79	25.12	180.96	0.00	180.99	7.43
																																124.66	-17.31	105.80	24.64	181.96	8.10	181.99	13.39
																																124.67	-17.31	105.81	24.36	182.96	0.10	182.99	13.19
																																124.68	-17.31	105.81	24.05	183.96	9.00	183.99	14.40
																																124.69	-17.31	105.82	23.58	184.96	0.50	184.99	14.12
																																124.70	-17.31	105.83	23.28	185.96	0.00	185.99	14.63
																																124.71	-17.31	105.83	22.97	186.96	0.00	186.99	14.58
																																124.72	-17.31	105.84	22.67	187.96	0.00	187.99	14.98
																																124.73	-17.31	105.85	22.26	188.96	0.00	188.99	16.69
																																124.74	-17.31	105.85	21.67	189.96	0.00	189.99	16.10
																																124.75	-17.31	105.86	21.09	190.96	0.00	190.99	11.59
																																124.76	-17.31	105.87	20.41	191.96	0.00	191.99	11.13
																																124.77	-17.31	105.88	19.71	192.96	0.00	192.99	11.78
																																124.78	-17.31	105.88	19.30	193.96	0.00	193.99	12.55
																																124.79	-17.31	105.89	18.65	194.96	0.00	194.99	12.37
																																124.80	-17.31	105.90	17.60	195.96	0.00	195.99	12.62
																																124.81	-17.31	105.90	16.74	196.96	0.00	196.99	14.26
																																124.82	-17.31	105.91	16.00	197.96	0.00	197.99	15.95
																																124.83	-17.31	105.92	15.64	198.96	0.00	198.99	16.48
																																124.84	-17.31	105.92	15.19	199.96	0.00	199.99	16.08
																																124.85	-17.31	105.93	14.83	200.96	0.00	200.99	15.15
																																124.86	-17.31	105.94	14.49	201.96	0.00	201.99	17.42
																																124.88	-17.31	105.94	14.15	202.96	0.00	202.99	18.89
																																124.89	-17.31	105.95	13.39	203.98	0.00	203.99	20.41
																																124.90	-17.31	105.96	12.14	204.98	16.50	204.99	18.58
																																124.91	-17.31	105.97	11.53	205.98	0.10	205.99	17.39
																																124.92	-17.31	105.97	10.96	206.98	16.90	206.99	19.12
																																124.93	-17.31	105.98	10.57	207.98	0.20	207.99	21.23
																																124.94	-17.31	105.99	10.11	208.98	9.90	208.99	20.90
																																124.95	-17.31	105.99	9.76	209.98	7.80	209.99	15.97
																																124.96	-17.31	106.00	9.31	210.98	1.00	210.99	14.47
																																124.97	-17.31	106.01	8.96	211.98	9.40	211.99	13.61
																																124.98	-17.31	106.01	8.71	212.98	0.00	212.99	17.79
																																124.99	-17.31	106.02	8.47	213.98	0.00	213.99	22.03
																																125.00	-17.31	106.03	8.23	214.98	0.00	214.99	21.00
																																125.01	-17.31	106.03	7.99	215.98	0.00	215.99	16.82
																																125.02	-17.31	106.04	7.67	216.98	0.00	216.99	17.38
																																125.03	-17.31	106.05	7.45	217.98	9.20	217.99	19.98
																																125.04	-17.31	106.06	7.15	218.98	0.10	218.99	15.02
																																125.05	-17.31	106.06	6.92	219.98	1.30	219.99	13.62
																																125.06	-18.29	106.07	6.71	220.98	0.00	220.99	12.47
																																125.07	-18.29	106.08	6.51	221.98	0.70	221.99	12.44
																																125.08	-17.31	106.08	6.29	222.98	0.10	222.99	10.53
																																125.09	-18.29	106.09	6.09	223.98	5.60	223.99	11.89
																																125.10	-18.29	106.10	5.95	224.98	20.80	224.99	9.05
																																125.11	-18.29	106.10	5.75	225.98	0.10	225.99	9.58
																																125.13	-18.29	106.11	5.57	226.98	0.00	226.99	11.65
																																125.14	-18.29	106.12	5.44	227.98	0.00	227.99	15.54
																																125.15	-18.29	106.13	5.32	228.98	0.00	228.99	15.28
																																125.16	-18.29	106.13	5.19	229.98	0.80	229.99	15.43
																																125.17	-18.29	106.14	5.07	230.98	20.90	230.99	12.65
																																125.18	-18.29	106.15	5.01	231.98	1.20	231.99	10.52
																																125.19	-18.29	106.15	4.89	232.98	0.00	232.99	9.90
																																125.20	-18.29	106.16	4.78	233.98	0.00	233.99	12.42
																																125.21	-18.29	106.17	4.66	234.98	0.10	234.99	13.39
																																125.22	-18.29	106.17	4.66	235.98	0.00	235.99	14.88
																																125.23	-18.29	106.18	4.61	236.98	0.00	236.99	14.51
																																125.24	-18.29	106.19	4.72	237.98	0.00	237.99	13.33
																																125.25	-18.29	106.19	4.72	238.98	0.00	238.99	10.34
																																125.26	-18.29	106.20	4.66	239.98	0.00	239.99	11.78
																																125.27	-18.29	106.21	4.61	240.98	0.00	240.99	12.15
																																125.28	-18.29	106.22	4.55	241.98	0.00	241.99	13.04
																																125.29	-18.29	106.22	4.49	242.98	3.10	242.99	12.03
																																125.30	-18.29	106.23	4.43	243.98	0.00	243.99	8.09
																																125.31	-17.31	106.24	4.43	244.98	6.90	244.99	9.32
																																125.32	-17.31	106.24	4.38	245.98	0.60	245.99	12.54
																																125.33	-17.31	106.25	4.32	246.98	0.10	246.99	14.61
																																125.34	-17.31	106.26	4.27	247.98	0.10	247.99	15.90
																																125.35	-17.31	106.26	4.21	248.98	0.00	248.99	16.41
																																125.36	-17.31	106.27	4.16	249.98	0.00	249.99	17.27
																																125.38	-17.31	106.28	4.10	250.98	2.00	250.99	13.36
																																125.39	-17.31	106.28	4.06	251.98	16.60	251.99	7.98
																																125.40	-17.31	106.29	4.01	252.98	17.90	252.99	6.81
																																125.41	-17.31	106.30	4.01	253.98	25.50	253.99	6.61
																																125.42	-18.29	106.31	3.96	254.98	6.60	254.99	7.62
																																125.43	-18.29	106.31	3.90	255.98	1.40	255.99	9.47
																																125.44	-18.29	106.32	3.85	256.98	0.30	256.99	9.67
																																125.45	-18.29	106.33	3.80	257.98	0.20	257.99	8.87
																																125.46	-18.29	106.33	3.75	258.98	0.10	258.99	6.59
																																125.47	-18.29	106.34	3.75	259.98	0.20	259.99	4.57
																																125.48	-18.29	106.35	3.70	260.98	0.10	260.99	5.22
																																125.49	-18.29	106.35	3.70	261.98	0.10	261.99	6.08
																																125.50	-18.29	106.36	3.65	262.98	0.10	262.99	7.51
																																125.51	-18.29	106.37	3.65	263.98	0.10	263.99	8.04
																																125.52	-18.29	106.38	3.70	264.98	0.00	264.99	9.05
																																125.53	-18.29	106.38	3.70	265.98	0.10	265.99	10.51
																																125.54	-18.29	106.39	3.80	266.98	0.10	266.99	9.72
																																125.55	-18.29	106.40	3.85	267.98	0.00	267.99	10.00
																																125.56	-18.29	106.40	3.96	268.98	0.10	268.99	7.10
																																125.57	-18.29	106.41	4.06	269.98	0.00	269.99	3.73
																																125.58	-18.29	106.42	4.10	270.98	24.50	270.99	4.84
																																125.59	-18.29	106.42	4.21	271.98	0.00	271.99	5.66
																																125.60	-18.29	106.43	4.38	272.98	0.00	272.99	4.33
																																125.61	-18.29	106.44	4.49	273.98	0.00	273.99	3.79
																																125.63	-19.26	106.44	4.61	274.98	0.00	274.99	4.19
																																125.64	-19.26	106.45	4.78	275.98	0.00	275.99	3.91
																																125.65	-19.26	106.46	4.95	276.98	0.00	276.99	8.53
																																125.66	-19.26	106.47	5.19	277.98	14.80	277.99	11.23
																																125.67	-19.26	106.47	5.44	278.98	1.60	278.99	9.17
																																125.68	-19.26	106.48	5.64	279.98	0.50	279.99	9.14
																																125.69	-19.26	106.49	5.89	280.98	0.00	280.99	8.97
																																125.70	-19.26	106.49	6.02	281.98	5.40	281.99	8.08
																																125.71	-19.26	106.50	6.29	282.98	9.50	282.99	3.15
																																125.72	-19.26	106.51	6.43	283.98	20.20	283.99	4.41
																																125.73	-19.26	106.51	6.63	284.98	1.10	284.99	4.04
																																125.74	-19.26	106.52	6.92	285.98	0.00	285.99	2.35
																																125.75	-19.26	106.53	7.45	286.98	1.30	286.99	4.70
																																125.76	-19.26	106.53	8.07	287.98	11.40	287.99	5.92
																																125.77	-19.26	106.54	8.64	288.99	2.20	288.99	4.73
																																125.78	-19.26	106.55	8.96	289.99	39.00	289.99	6.55
																																125.79	-19.26	106.56	9.23	290.99	13.00	290.99	4.45
																																125.80	-19.26	106.56	9.31	291.99	3.00	291.99	7.37
																																125.81	-19.26	106.57	9.31	292.99	7.00	292.99	11.59
																																125.82	-19.26	106.58	9.40	293.99	7.00	293.99	9.91
																																125.83	-19.26	106.58	9.76	294.99	0.00	294.99	12.55
																																125.84	-19.26	106.59	9.76	295.99	0.00	295.99	12.60
																																125.85	-19.26	106.60	9.76	296.99	7.00	296.99	8.52
																																125.86	-19.26	106.60	9.76	297.99	3.00	297.99	9.32
																																125.88	-19.26	106.61	9.76	298.99	74.00	298.99	11.89
																																125.89	-19.26	106.62	9.76	299.99	81.00	299.99	10.05
																																125.90	-19.26	106.63	9.76	300.99	112.00	300.99	8.84
																																125.91	-19.26	106.63	9.76	301.99	4.00	301.99	5.66
																																125.92	-19.26	106.64	9.92	302.99	3.00	302.99	3.48
																																125.93	-19.26	106.65	9.83	303.99	2.00	303.99	3.12
																																125.94	-19.26	106.65	9.92	304.99	14.00	304.99	3.92
																																125.95	-19.26	106.66	10.11	305.99	216.00	305.99	6.18
																																125.96	-19.26	106.67	10.29	306.99	109.00	306.99	4.35
																																125.97	-19.26	106.67	10.57	307.99	152.00	307.99	3.43
																																125.98	-19.26	106.68	10.57	308.99	19.00	308.99	1.47
																																125.99	-19.26	106.69	10.48	309.99	192.00	309.99	2.08
																																126.00	-19.26	106.69	10.57	310.99	309.00	310.99	7.81
																																126.01	-19.26	106.70	10.67	311.99	71.00	311.99	5.30
																																126.02	-19.26	106.71	10.57	312.99	22.00	312.99	3.68
																																126.03	-19.26	106.72	10.67	313.99	87.00	313.99	1.08
																																126.04	-19.26	106.72	10.86	314.99	0.00	314.99	1.37
																																126.05	-19.26	106.73	11.05	315.99	1.00	315.99	1.43
																																126.06	-19.26	106.74	11.13	316.99	12.00	316.99	1.98
																																126.07	-19.26	106.74	10.96	317.99	1.00	317.99	-0.40
																																126.08	-19.26	106.75	11.33	318.99	1.00	318.99	-1.20
																																126.09	-19.26	106.76	11.43	319.99	0.00	319.99	1.09
																																126.10	-19.26	106.76	11.53	320.99	0.00	320.99	1.33
																																126.11	-19.26	106.77	11.53	321.99	1.00	321.99	0.41
																																126.13	-19.26	106.78	11.53	322.99	49.00	322.99	0.04
																																126.14	-19.26	106.78	11.93	323.99	0.00	323.99	-1.57
																																126.15	-19.26	106.79	12.34	324.99	0.00	324.99	-2.68
																																126.16	-19.26	106.80	12.74	325.99	17.00	325.99	-1.29
																																126.17	-19.26	106.81	12.96	326.99	122.00	326.99	0.45
																																126.18	-19.26	106.81	12.74	327.99	21.00	327.99	-1.30
																																126.19	-19.26	106.82	11.63	328.99	1.00	328.99	-4.24
																																126.20	-19.26	106.83	10.20	329.99	0.00	329.99	-4.02
																																126.21	-19.26	106.83	9.83	330.99	3.00	330.99	-4.18
																																126.22	-19.26	106.84	9.58	331.99	43.00	331.99	1.15
																																126.23	-19.26	106.85	9.40	332.99	12.00	332.99	-0.01
																																126.24	-19.26	106.85	9.14	333.99	0.00	333.99	-0.64
																																126.25	-19.26	106.86	8.96	334.99	220.00	334.99	0.57
																																126.26	-19.26	106.87	8.79	335.99	0.00	335.99	-0.46
																																126.27	-19.26	106.88	8.71	336.99	0.00	336.99	-0.89
																																126.28	-19.26	106.88	8.56	337.99	0.00	337.99	-2.26
																																126.29	-19.26	106.89	8.39	338.99	0.00	338.99	-1.91
																																126.30	-19.26	106.90	8.23	339.99	0.00	339.99	-4.12
																																126.31	-19.26	106.90	8.15	340.99	0.00	340.99	-3.18
																																126.32	-19.26	106.91	8.07	341.99	68.00	341.99	0.64
																																126.33	-19.26	106.92	7.99	342.99	0.00	342.99	2.94
																																126.34	-19.26	106.92	7.83	343.99	0.00	343.99	3.48
																																126.35	-19.26	106.93	7.67	344.99	1.00	344.99	1.30
																																126.36	-19.26	106.94	7.59	345.99	1.00	345.99	2.94
																																126.38	-19.26	106.94	7.53	346.99	1.00	346.99	1.57
																																126.39	-19.26	106.95	7.45	347.99	0.00	347.99	-1.62
																																126.40	-19.26	106.96	7.37	348.99	0.00	348.99	0.13
																																126.41	-19.26	106.97	7.30	349.99	1.00	349.99	3.02
																																126.42	-19.26	106.97	7.22	350.99	0.00	350.99	3.31
																																126.43	-19.26	106.98	7.15	351.99	0.00	351.99	2.21
																																126.44	-19.26	106.99	7.07	352.99	40.00	352.99	2.65
																																126.45	-19.26	106.99	7.00	353.99	3.00	353.99	0.82
																																126.46	-19.26	107.00	6.92	354.99	0.00	354.99	-0.66
																																126.47	-19.26	107.01	6.85	355.99	30.00	355.99	2.30
																																126.48	-19.26	107.01	6.78	356.99	32.00	356.99	1.93
																																126.49	-18.29	107.02	6.71	357.99	0.00	357.99	6.01
																																126.50	-18.29	107.03	6.63	358.99	59.00	358.99	4.75
																																126.51	-18.29	107.03	6.63	359.99	23.00	359.99	1.92
																																126.52	-18.29	107.04	6.51	360.99	0.00	360.99	0.75
																																126.53	-18.29	107.05	6.51	361.99	51.00	361.99	4.14
																																126.54	-18.29	107.06	6.43	362.99	54.00	362.99	0.12
																																126.55	-17.31	107.06	6.43	363.99	0.00	363.99	-2.02
																																126.56	-18.29	107.07	6.36	364.99	36.00	364.99	-1.00
																																126.57	-18.29	107.08	6.29
																																126.58	-17.31	107.08	6.23
																																126.59	-17.31	107.09	6.23
																																126.60	-17.31	107.10	6.16
																																126.61	-17.31	107.10	6.09
																																126.63	-17.31	107.11	6.09
																																126.64	-17.31	107.12	6.02
																																126.65	-17.31	107.13	6.02
																																126.66	-17.31	107.13	5.95
																																126.67	-17.31	107.14	5.95
																																126.68	-17.31	107.15	5.82
																																126.69	-17.31	107.15	5.82
																																126.70	-17.31	107.16	5.82
																																126.71	-17.31	107.17	5.75
																																126.72	-17.31	107.17	5.69
																																126.73	-17.31	107.18	5.69
																																126.74	-17.31	107.19	5.69
																																126.75	-17.31	107.19	5.69
																																126.76	-17.31	107.20	5.64
																																126.77	-17.31	107.21	5.64
																																126.78	-17.31	107.22	5.64
																																126.79	-17.31	107.22	5.64
																																126.80	-17.31	107.23	5.64
																																126.81	-17.31	107.24	5.64
																																126.82	-17.31	107.24	5.64
																																126.83	-17.31	107.25	5.57
																																126.84	-17.31	107.26	5.57
																																126.85	-17.31	107.26	5.57
																																126.86	-17.31	107.27	5.57
																																126.88	-17.31	107.28	5.51
																																126.89	-17.31	107.28	5.51
																																126.90	-17.31	107.29	5.51
																																126.91	-17.31	107.30	5.44
																																126.92	-17.31	107.31	5.44
																																126.93	-17.31	107.31	5.44
																																126.94	-17.31	107.32	5.44
																																126.95	-17.31	107.33	5.44
																																126.96	-17.31	107.33	5.44
																																126.97	-17.31	107.34	5.44
																																126.98	-17.31	107.35	5.44
																																126.99	-17.31	107.35	5.44
																																127.00	-17.31	107.36	5.44
																																127.01	-17.31	107.37	5.51
																																127.02	-17.31	107.38	5.57
																																127.03	-17.31	107.38	5.64
																																127.04	-17.31	107.39	5.69
																																127.05	-17.31	107.40	5.75
																																127.06	-17.31	107.40	5.89
																																127.07	-17.31	107.41	5.89
																																127.08	-17.31	107.42	5.95
																																127.09	-17.31	107.42	6.02
																																127.10	-17.31	107.43	6.09
																																127.11	-17.31	107.44	6.16
																																127.13	-17.31	107.44	6.23
																																127.14	-17.31	107.45	6.29
																																127.15	-17.31	107.46	6.58
																																127.16	-17.31	107.47	6.78
																																127.17	-17.31	107.47	7.15
																																127.18	-17.31	107.48	7.30
																																127.19	-17.31	107.49	7.53
																																127.20	-17.31	107.49	7.67
																																127.21	-17.31	107.50	7.91
																																127.22	-17.31	107.51	8.07
																																127.23	-17.31	107.51	8.31
																																127.24	-17.31	107.52	8.47
																																127.25	-17.31	107.53	8.71
																																127.26	-17.31	107.53	8.71
																																127.27	-17.31	107.54	8.79
																																127.28	-17.31	107.55	8.88
																																127.29	-17.31	107.56	8.88
																																127.30	-17.31	107.56	9.05
																																127.31	-17.31	107.57	9.05
																																127.32	-17.31	107.58	9.14
																																127.33	-17.31	107.58	9.14
																																127.34	-17.31	107.59	9.05
																																127.35	-17.31	107.60	8.96
																																127.36	-17.31	107.60	8.88
																																127.38	-17.31	107.61	8.71
																																127.39	-18.29	107.62	8.64
																																127.40	-18.29	107.63	8.56
																																127.41	-18.29	107.63	8.39
																																127.42	-18.29	107.64	8.31
																																127.43	-18.29	107.65	8.23
																																127.44	-18.29	107.65	8.23
																																127.45	-18.29	107.66	8.15
																																127.46	-18.29	107.67	8.15
																																127.47	-18.29	107.67	8.15
																																127.48	-18.29	107.68	8.23
																																127.49	-18.29	107.69	8.23
																																127.50	-18.29	107.69	8.23
																																127.51	-19.26	107.70	8.23
																																127.52	-19.26	107.71	8.23
																																127.53	-19.26	107.72	8.15
																																127.54	-19.26	107.72	8.07
																																127.55	-19.26	107.73	7.99
																																127.56	-19.26	107.74	7.91
																																127.57	-19.26	107.74	7.91
																																127.58	-19.26	107.75	7.75
																																127.59	-19.26	107.76	7.67
																																127.60	-19.26	107.76	7.59
																																127.61	-19.26	107.77	7.53
																																127.63	-19.26	107.78	7.45
																																127.64	-19.26	107.78	7.37
																																127.65	-19.26	107.79	7.22
																																127.66	-19.26	107.80	7.22
																																127.67	-19.26	107.81	7.07
																																127.68	-19.26	107.81	7.00
																																127.69	-19.26	107.82	6.92
																																127.70	-19.26	107.83	6.85
																																127.71	-19.26	107.83	6.78
																																127.72	-19.26	107.84	6.71
																																127.73	-19.26	107.85	6.58
																																127.74	-19.26	107.85	6.51
																																127.75	-19.26	107.86	6.43
																																127.76	-19.26	107.87	6.36
																																127.77	-19.26	107.88	6.29
																																127.78	-19.26	107.88	6.16
																																127.79	-20.24	107.89	6.09
																																127.80	-20.24	107.90	6.02
																																127.81	-20.24	107.90	6.02
																																127.82	-20.24	107.91	5.95
																																127.83	-20.24	107.92	5.89
																																127.84	-20.24	107.92	5.82
																																127.85	-20.24	107.93	5.75
																																127.86	-20.24	107.94	5.69
																																127.88	-20.24	107.94	5.64
																																127.89	-20.24	107.95	5.64
																																127.90	-20.24	107.96	5.51
																																127.91	-20.24	107.97	5.51
																																127.92	-20.24	107.97	5.44
																																127.93	-20.24	107.98	5.38
																																127.94	-20.24	107.99	5.38
																																127.95	-20.24	107.99	5.32
																																127.96	-20.24	108.00	5.25
																																127.97	-20.24	108.01	5.25
																																127.98	-20.24	108.01	5.19
																																127.99	-20.24	108.02	5.13
																																128.00	-20.24	108.03	5.13
																																128.01	-20.24	108.03	5.07
																																128.02	-20.24	108.04	5.07
																																128.03	-20.24	108.05	5.01
																																128.04	-20.24	108.06	4.95
																																128.05	-20.24	108.06	4.95
																																128.06	-20.24	108.07	4.89
																																128.07	-20.24	108.08	4.89
																																128.08	-20.24	108.08	4.84
																																128.09	-20.24	108.09	4.78
																																128.10	-20.24	108.10	4.78
																																128.11	-20.24	108.10	4.72
																																128.13	-20.24	108.11	4.72
																																128.14	-20.24	108.12	4.66
																																128.15	-20.24	108.13	4.66
																																128.16	-20.24	108.13	4.61
																																128.17	-20.24	108.14	4.61
																																128.18	-19.26	108.15	4.55
																																128.19	-20.24	108.15	4.55
																																128.20	-20.24	108.16	4.49
																																128.21	-19.26	108.17	4.49
																																128.22	-20.24	108.17	4.43
																																128.23	-20.24	108.18	4.43
																																128.24	-20.24	108.19	4.38
																																128.25	-20.24	108.19	4.32
																																128.26	-20.24	108.20	4.32
																																128.27	-20.24	108.21	4.27
																																128.28	-20.24	108.22	4.27
																																128.29	-20.24	108.22	4.21
																																128.30	-20.24	108.23	4.16
																																128.31	-20.24	108.24	4.16
																																128.32	-20.24	108.24	4.10
																																128.33	-20.24	108.25	4.10
																																128.34	-20.24	108.26	4.06
																																128.35	-20.24	108.26	4.06
																																128.36	-20.24	108.27	4.01
																																128.38	-20.24	108.28	4.01
																																128.39	-20.24	108.28	4.01
																																128.40	-20.24	108.29	3.96
																																128.41	-20.24	108.30	3.90
																																128.42	-20.24	108.31	3.90
																																128.43	-20.24	108.31	3.90
																																128.44	-20.24	108.32	3.85
																																128.45	-20.24	108.33	3.80
																																128.46	-20.24	108.33	3.80
																																128.47	-20.24	108.34	3.80
																																128.48	-20.24	108.35	3.75
																																128.49	-20.24	108.35	3.75
																																128.50	-20.24	108.36	3.75
																																128.51	-20.24	108.37	3.70
																																128.52	-20.24	108.38	3.65
																																128.53	-20.24	108.38	3.65
																																128.54	-20.24	108.39	3.65
																																128.55	-20.24	108.40	3.60
																																128.56	-20.24	108.40	3.60
																																128.57	-20.24	108.41	3.60
																																128.58	-20.24	108.42	3.60
																																128.59	-20.24	108.42	3.60
																																128.60	-20.24	108.43	3.60
																																128.61	-19.26	108.44	3.60
																																128.63	-19.26	108.44	3.65
																																128.64	-17.31	108.45	3.65
																																128.65	-15.36	108.46	3.65
																																128.66	-15.36	108.47	3.65
																																128.67	-15.36	108.47	3.70
																																128.68	-15.36	108.48	3.70
																																128.69	-15.36	108.49	3.75
																																128.70	-16.34	108.49	3.75
																																128.71	-16.34	108.50	3.80
																																128.72	-16.34	108.51	3.85
																																128.73	-16.34	108.51	3.90
																																128.74	-16.34	108.52	3.90
																																128.75	-16.34	108.53	3.96
																																128.76	-16.34	108.53	3.96
																																128.77	-16.34	108.54	3.96
																																128.78	-16.34	108.55	3.96
																																128.79	-16.34	108.56	3.96
																																128.80	-16.34	108.56	3.96
																																128.81	-16.34	108.57	4.01
																																128.82	-16.34	108.58	4.06
																																128.83	-16.34	108.58	4.10
																																128.84	-16.34	108.59	4.16
																																128.85	-16.34	108.60	4.21
																																128.86	-16.34	108.60	4.32
																																128.88	-16.34	108.61	4.38
																																128.89	-16.34	108.62	4.38
																																128.90	-16.34	108.63	4.38
																																128.91	-16.34	108.63	4.32
																																128.92	-16.34	108.64	4.27
																																128.93	-16.34	108.65	4.16
																																128.94	-16.34	108.65	4.10
																																128.95	-16.34	108.66	4.01
																																128.96	-16.34	108.67	4.01
																																128.97	-16.34	108.67	3.90
																																128.98	-16.34	108.68	3.85
																																128.99	-16.34	108.69	3.80
																																129.00	-16.34	108.69	3.75
																																129.01	-16.34	108.70	3.70
																																129.02	-16.34	108.71	3.65
																																129.03	-16.34	108.72	3.60
																																129.04	-16.34	108.72	3.45
																																129.05	-16.34	108.73	3.45
																																129.06	-16.34	108.74	3.41
																																129.07	-16.34	108.74	3.36
																																129.08	-16.34	108.75	3.27
																																129.09	-16.34	108.76	3.22
																																129.10	-16.34	108.76	3.22
																																129.11	-16.34	108.77	3.18
																																129.13	-16.34	108.78	3.13
																																129.14	-16.34	108.78	3.13
																																129.15	-16.34	108.79	3.08
																																129.16	-16.34	108.80	3.04
																																129.17	-16.34	108.81	3.04
																																129.18	-16.34	108.81	2.99
																																129.19	-16.34	108.82	2.95
																																129.20	-16.34	108.83	2.95
																																129.21	-16.34	108.83	2.91
																																129.22	-16.34	108.84	2.91
																																129.23	-16.34	108.85	2.86
																																129.24	-16.34	108.85	2.82
																																129.25	-16.34	108.86	2.82
																																129.26	-16.34	108.87	2.79
																																129.27	-16.34	108.88	2.79
																																129.28	-16.34	108.88	2.74
																																129.29	-16.34	108.89	2.74
																																129.30	-16.34	108.90	2.74
																																129.31	-16.34	108.90	2.70
																																129.32	-16.34	108.91	2.70
																																129.33	-16.34	108.92	2.70
																																129.34	-16.34	108.92	2.66
																																129.35	-16.34	108.93	2.66
																																129.36	-16.34	108.94	2.66
																																129.38	-16.34	108.94	2.62
																																129.39	-16.34	108.95	2.62
																																129.40	-16.34	108.96	2.62
																																129.41	-17.31	108.97	2.58
																																129.42	-17.31	108.97	2.58
																																129.43	-17.31	108.98	2.58
																																129.44	-17.31	108.99	2.54
																																129.45	-17.31	108.99	2.54
																																129.46	-17.31	109.00	2.54
																																129.47	-17.31	109.01	2.54
																																129.48	-17.31	109.01	2.54
																																129.49	-17.31	109.02	2.50
																																129.50	-17.31	109.03	2.50
																																129.51	-17.31	109.03	2.50
																																129.52	-17.31	109.04	2.50
																																129.53	-17.31	109.05	2.50
																																129.54	-17.31	109.06	2.46
																																129.55	-17.31	109.06	2.46
																																129.56	-17.31	109.07	2.46
																																129.57	-17.31	109.08	2.46
																																129.58	-17.31	109.08	2.46
																																129.59	-18.29	109.09	2.46
																																129.60	-18.29	109.10	2.42
																																129.61	-18.29	109.10	2.42
																																129.63	-18.29	109.11	2.42
																																129.64	-18.29	109.12	2.38
																																129.65	-17.31	109.13	2.38
																																129.66	-17.31	109.13	2.38
																																129.67	-17.31	109.14	2.38
																																129.68	-17.31	109.15	2.34
																																129.69	-17.31	109.15	2.34
																																129.70	-17.31	109.16	2.30
																																129.71	-17.31	109.17	2.30
																																129.72	-17.31	109.17	2.30
																																129.73	-18.29	109.18	2.30
																																129.74	-18.29	109.19	2.27
																																129.75	-18.29	109.19	2.27
																																129.76	-18.29	109.20	2.27
																																129.77	-18.29	109.21	2.23
																																129.78	-18.29	109.22	2.23
																																129.79	-18.29	109.22	2.23
																																129.80	-18.29	109.23	2.20
																																129.81	-18.29	109.24	2.20
																																129.82	-18.29	109.24	2.20
																																129.83	-18.29	109.25	2.16
																																129.84	-18.29	109.26	2.16
																																129.85	-18.29	109.26	2.12
																																129.86	-18.29	109.27	2.09
																																129.88	-18.29	109.28	2.09
																																129.89	-18.29	109.28	2.09
																																129.90	-18.29	109.29	2.02
																																129.91	-18.29	109.30	2.02
																																129.92	-18.29	109.31	1.98
																																129.93	-18.29	109.31	1.98
																																129.94	-18.29	109.32	1.98
																																129.95	-18.29	109.33	1.95
																																129.96	-18.29	109.33	1.95
																																129.97	-18.29	109.34	1.91
																																129.98	-18.29	109.35	1.91
																																129.99	-18.29	109.35	1.91
																																130.00	-18.29	109.36	1.91
																																130.01	-18.29	109.37	1.91
																																130.02	-18.29	109.38	1.91
																																130.03	-18.29	109.38	1.91
																																130.04	-18.29	109.39	1.91
																																130.05	-18.29	109.40	1.91
																																130.06	-19.26	109.40	1.91
																																130.07	-19.26	109.41	1.91
																																130.08	-19.26	109.42	1.91
																																130.09	-19.26	109.42	1.95
																																130.10	-19.26	109.43	1.95
																																130.11	-19.26	109.44	1.95
																																130.13	-19.26	109.44	1.95
																																130.14	-18.29	109.45	1.98
																																130.15	-19.26	109.46	1.98
																																130.16	-19.26	109.47	2.02
																																130.17	-19.26	109.47	2.02
																																130.18	-19.26	109.48	2.02
																																130.19	-19.26	109.49	2.05
																																130.20	-19.26	109.49	2.05
																																130.21	-19.26	109.50	2.09
																																130.22	-19.26	109.51	2.09
																																130.23	-19.26	109.51	2.12
																																130.24	-19.26	109.52	2.16
																																130.25	-19.26	109.53	2.20
																																130.26	-19.26	109.53	2.23
																																130.27	-19.26	109.54	2.27
																																130.28	-19.26	109.55	2.30
																																130.29	-19.26	109.56	2.34
																																130.30	-19.26	109.56	2.38
																																130.31	-19.26	109.57	2.38
																																130.32	-19.26	109.58	2.42
																																130.33	-19.26	109.58	2.46
																																130.34	-19.26	109.59	2.50
																																130.35	-19.26	109.60	2.58
																																130.36	-19.26	109.60	2.58
																																130.38	-19.26	109.61	2.58
																																130.39	-19.26	109.62	2.58
																																130.40	-19.26	109.63	2.62
																																130.41	-19.26	109.63	2.62
																																130.42	-19.26	109.64	2.62
																																130.43	-19.26	109.65	2.58
																																130.44	-19.26	109.65	2.58
																																130.45	-19.26	109.66	2.58
																																130.46	-19.26	109.67	2.58
																																130.47	-19.26	109.67	2.54
																																130.48	-19.26	109.68	2.54
																																130.49	-19.26	109.69	2.50
																																130.50	-19.26	109.69	2.46
																																130.51	-19.26	109.70	2.46
																																130.52	-19.26	109.71	2.46
																																130.53	-19.26	109.72	2.42
																																130.54	-19.26	109.72	2.42
																																130.55	-19.26	109.73	2.38
																																130.56	-19.26	109.74	2.34
																																130.57	-19.26	109.74	2.34
																																130.58	-19.26	109.75	2.30
																																130.59	-19.26	109.76	2.30
																																130.60	-19.26	109.76	2.27
																																130.61	-19.26	109.77	2.23
																																130.63	-19.26	109.78	2.23
																																130.64	-19.26	109.78	2.20
																																130.65	-19.26	109.79	2.16
																																130.66	-19.26	109.80	2.16
																																130.67	-19.26	109.81	2.12
																																130.68	-19.26	109.81	2.09
																																130.69	-19.26	109.82	2.05
																																130.70	-19.26	109.83	2.02
																																130.71	-19.26	109.83	2.02
																																130.72	-19.26	109.84	1.98
																																130.73	-19.26	109.85	1.95
																																130.74	-19.26	109.85	1.91
																																130.75	-19.26	109.86	1.91
																																130.76	-19.26	109.87	1.91
																																130.77	-19.26	109.88	1.88
																																130.78	-19.26	109.88	1.85
																																130.79	-19.26	109.89	1.85
																																130.80	-19.26	109.90	1.81
																																130.81	-19.26	109.90	1.81
																																130.82	-19.26	109.91	1.79
																																130.83	-19.26	109.92	1.79
																																130.84	-19.26	109.92	1.75
																																130.85	-19.26	109.93	1.75
																																130.86	-19.26	109.94	1.75
																																130.88	-19.26	109.94	1.72
																																130.89	-19.26	109.95	1.72
																																130.90	-19.26	109.96	1.69
																																130.91	-19.26	109.97	1.69
																																130.92	-19.26	109.97	1.69
																																130.93	-19.26	109.98	1.69
																																130.94	-19.26	109.99	1.66
																																130.95	-19.26	109.99	1.66
																																130.96	-19.26	110.00	1.66
																																130.97	-19.26	110.01	1.63
																																130.98	-19.26	110.01	1.63
																																130.99	-19.26	110.02	1.63
																																131.00	-19.26	110.03	1.63
																																131.01	-19.26	110.03	1.60
																																131.02	-19.26	110.04	1.60
																																131.03	-19.26	110.05	1.60
																																131.04	-19.26	110.06	1.57
																																131.05	-19.26	110.06	1.57
																																131.06	-19.26	110.07	1.57
																																131.07	-19.26	110.08	1.57
																																131.08	-19.26	110.08	1.57
																																131.09	-19.26	110.09	1.54
																																131.10	-19.26	110.10	1.54
																																131.11	-19.26	110.10	1.54
																																131.13	-19.26	110.11	1.54
																																131.14	-19.26	110.12	1.54
																																131.15	-19.26	110.13	1.51
																																131.16	-19.26	110.13	1.51
																																131.17	-19.26	110.14	1.48
																																131.18	-19.26	110.15	1.48
																																131.19	-19.26	110.15	1.48
																																131.20	-19.26	110.16	1.48
																																131.21	-19.26	110.17	1.48
																																131.22	-19.26	110.17	1.45
																																131.23	-19.26	110.18	1.45
																																131.24	-19.26	110.19	1.45
																																131.25	-19.26	110.19	1.45
																																131.26	-19.26	110.20	1.45
																																131.27	-19.26	110.21	1.45
																																131.28	-19.26	110.22	1.45
																																131.29	-19.26	110.22	1.42
																																131.30	-19.26	110.23	1.42
																																131.31	-19.26	110.24	1.42
																																131.32	-19.26	110.24	1.42
																																131.33	-19.26	110.25	1.42
																																131.34	-19.26	110.26	1.42
																																131.35	-19.26	110.26	1.42
																																131.36	-19.26	110.27	1.42
																																131.38	-18.29	110.28	1.42
																																131.39	-17.31	110.28	1.40
																																131.40	-16.34	110.29	1.42
																																131.41	-16.34	110.30	1.42
																																131.42	-16.34	110.31	1.40
																																131.43	-16.34	110.31	1.40
																																131.44	-16.34	110.32	1.40
																																131.45	-16.34	110.33	1.40
																																131.46	-16.34	110.33	1.40
																																131.47	-16.34	110.34	1.40
																																131.48	-15.36	110.35	1.40
																																131.49	-15.36	110.35	1.40
																																131.50	-15.36	110.36	1.40
																																131.51	-15.36	110.37	1.37
																																131.52	-15.36	110.38	1.40
																																131.53	-15.36	110.38	1.37
																																131.54	-15.36	110.39	1.37
																																131.55	-15.36	110.40	1.40
																																131.56	-15.36	110.40	1.40
																																131.57	-15.36	110.41	1.40
																																131.58	-15.36	110.42	1.40
																																131.59	-15.36	110.42	1.40
																																131.60	-15.36	110.43	1.40
																																131.61	-15.36	110.44	1.40
																																131.63	-15.36	110.44	1.40
																																131.64	-15.36	110.45	1.42
																																131.65	-15.36	110.46	1.40
																																131.66	-15.36	110.47	1.42
																																131.67	-15.36	110.47	1.42
																																131.68	-15.36	110.48	1.42
																																131.69	-15.36	110.49	1.45
																																131.70	-15.36	110.49	1.45
																																131.71	-14.38	110.50	1.48
																																131.72	-13.41	110.51	1.48
																																131.73	-12.43	110.51	1.51
																																131.74	-12.43	110.52	1.54
																																131.75	-12.43	110.53	1.57
																																131.76	-12.43	110.53	1.57
																																131.77	-12.43	110.54	1.63
																																131.78	-12.43	110.55	1.66
																																131.79	-12.43	110.56	1.69
																																131.80	-12.43	110.56	1.72
																																131.81	-11.46	110.57	1.75
																																131.82	-12.43	110.58	1.81
																																131.83	-12.43	110.58	1.85
																																131.84	-12.43	110.59	1.91
																																131.85	-12.43	110.60	1.95
																																131.86	-12.43	110.60	2.02
																																131.88	-12.43	110.61	2.05
																																131.89	-12.43	110.62	2.05
																																131.90	-12.43	110.63	2.05
																																131.91	-12.43	110.63	2.05
																																131.92	-12.43	110.64	2.05
																																131.93	-12.43	110.65	2.05
																																131.94	-12.43	110.65	2.05
																																131.95	-12.43	110.66	2.02
																																131.96	-12.43	110.67	2.02
																																131.97	-12.43	110.67	2.02
																																131.98	-12.43	110.68	2.02
																																131.99	-12.43	110.69	2.02
																																132.00	-12.43	110.69	2.02
																																132.01	-12.43	110.70	2.02
																																132.02	-12.43	110.71	2.02
																																132.03	-12.43	110.72	2.02
																																132.04	-12.43	110.72	2.02
																																132.05	-12.43	110.73	1.98
																																132.06	-12.43	110.74	1.98
																																132.07	-12.43	110.74	1.98
																																132.08	-12.43	110.75	1.95
																																132.09	-12.43	110.76	1.88
																																132.10	-12.43	110.76	1.85
																																132.11	-12.43	110.77	1.81
																																132.13	-12.43	110.78	1.79
																																132.14	-12.43	110.78	1.75
																																132.15	-12.43	110.79	1.75
																																132.16	-12.43	110.80	1.72
																																132.17	-12.43	110.81	1.69
																																132.18	-12.43	110.81	1.69
																																132.19	-13.41	110.82	1.66
																																132.20	-13.41	110.83	1.66
																																132.21	-13.41	110.83	1.63
																																132.22	-13.41	110.84	1.60
																																132.23	-13.41	110.85	1.60
																																132.24	-13.41	110.85	1.57
																																132.25	-13.41	110.86	1.57
																																132.26	-13.41	110.87	1.54
																																132.27	-13.41	110.88	1.54
																																132.28	-13.41	110.88	1.51
																																132.29	-13.41	110.89	1.48
																																132.30	-13.41	110.90	1.48
																																132.31	-13.41	110.90	1.45
																																132.32	-13.41	110.91	1.45
																																132.33	-13.41	110.92	1.40
																																132.34	-13.41	110.92	1.40
																																132.35	-13.41	110.93	1.40
																																132.36	-13.41	110.94	1.40
																																132.38	-13.41	110.94	1.37
																																132.39	-13.41	110.95	1.37
																																132.40	-13.41	110.96	1.34
																																132.41	-13.41	110.97	1.34
																																132.42	-12.43	110.97	1.34
																																132.43	-12.43	110.98	1.34
																																132.44	-12.43	110.99	1.34
																																132.45	-12.43	110.99	1.31
																																132.46	-12.43	111.00	1.31
																																132.47	-12.43	111.01	1.29
																																132.48	-12.43	111.01	1.29
																																132.49	-12.43	111.02	1.29
																																132.50	-12.43	111.03	1.29
																																132.51	-12.43	111.03	1.29
																																132.52	-12.43	111.04	1.29
																																132.53	-11.46	111.05	1.26
																																132.54	-11.46	111.06	1.26
																																132.55	-11.46	111.06	1.26
																																132.56	-11.46	111.07	1.26
																																132.57	-11.46	111.08	1.26
																																132.58	-11.46	111.08	1.26
																																132.59	-11.46	111.09	1.26
																																132.60	-11.46	111.10	1.26
																																132.61	-11.46	111.10	1.23
																																132.63	-11.46	111.11	1.23
																																132.64	-11.46	111.12	1.23
																																132.65	-11.46	111.13	1.23
																																132.66	-11.46	111.13	1.23
																																132.67	-11.46	111.14	1.23
																																132.68	-11.46	111.15	1.23
																																132.69	-11.46	111.15	1.23
																																132.70	-11.46	111.16	1.21
																																132.71	-10.48	111.17	1.21
																																132.72	-10.48	111.17	1.21
																																132.73	-10.48	111.18	1.21
																																132.74	-10.48	111.19	1.21
																																132.75	-11.46	111.19	1.21
																																132.76	-11.46	111.20	1.21
																																132.77	-11.46	111.21	1.21
																																132.78	-11.46	111.22	1.21
																																132.79	-10.48	111.22	1.21
																																132.80	-10.48	111.23	1.21
																																132.81	-10.48	111.24	1.21
																																132.82	-10.48	111.24	1.21
																																132.83	-10.48	111.25	1.18
																																132.84	-10.48	111.26	1.18
																																132.85	-10.48	111.26	1.18
																																132.86	-10.48	111.27	1.18
																																132.88	-10.48	111.28	1.18
																																132.89	-11.46	111.28	1.18
																																132.90	-11.46	111.29	1.18
																																132.91	-11.46	111.30	1.18
																																132.92	-11.46	111.31	1.18
																																132.93	-11.46	111.31	1.18
																																132.94	-11.46	111.32	1.18
																																132.95	-11.46	111.33	1.18
																																132.96	-11.46	111.33	1.18
																																132.97	-11.46	111.34	1.18
																																132.98	-11.46	111.35	1.18
																																132.99	-11.46	111.35	1.18
																																133.00	-11.46	111.36	1.18
																																133.01	-11.46	111.37	1.16
																																133.02	-11.46	111.38	1.16
																																133.03	-10.48	111.38	1.18
																																133.04	-11.46	111.39	1.18
																																133.05	-11.46	111.40	1.18
																																133.06	-11.46	111.40	1.18
																																133.07	-11.46	111.41	1.18
																																133.08	-11.46	111.42	1.18
																																133.09	-11.46	111.42	1.18
																																133.10	-11.46	111.43	1.18
																																133.11	-11.46	111.44	1.18
																																133.13	-11.46	111.44	1.18
																																133.14	-11.46	111.45	1.18
																																133.15	-11.46	111.46	1.18
																																133.16	-11.46	111.47	1.18
																																133.17	-11.46	111.47	1.18
																																133.18	-11.46	111.48	1.21
																																133.19	-11.46	111.49	1.21
																																133.20	-11.46	111.49	1.21
																																133.21	-11.46	111.50	1.23
																																133.22	-11.46	111.51	1.23
																																133.23	-9.50	111.51	1.23
																																133.24	-9.50	111.52	1.26
																																133.25	-9.50	111.53	1.26
																																133.26	-9.50	111.53	1.26
																																133.27	-9.50	111.54	1.26
																																133.28	-10.48	111.55	1.26
																																133.29	-10.48	111.56	1.26
																																133.30	-10.48	111.56	1.26
																																133.31	-10.48	111.57	1.26
																																133.32	-10.48	111.58	1.26
																																133.33	-10.48	111.58	1.26
																																133.34	-10.48	111.59	1.26
																																133.35	-10.48	111.60	1.23
																																133.36	-10.48	111.60	1.26
																																133.38	-10.48	111.61	1.26
																																133.39	-10.48	111.62	1.26
																																133.40	-10.48	111.63	1.26
																																133.41	-10.48	111.63	1.26
																																133.42	-10.48	111.64	1.26
																																133.43	-10.48	111.65	1.26
																																133.44	-10.48	111.65	1.26
																																133.45	-10.48	111.66	1.29
																																133.46	-11.46	111.67	1.29
																																133.47	-11.46	111.67	1.31
																																133.48	-11.46	111.68	1.31
																																133.49	-11.46	111.69	1.31
																																133.50	-11.46	111.69	1.34
																																133.51	-11.46	111.70	1.34
																																133.52	-11.46	111.71	1.37
																																133.53	-11.46	111.72	1.40
																																133.54	-11.46	111.72	1.42
																																133.55	-11.46	111.73	1.42
																																133.56	-11.46	111.74	1.45
																																133.57	-11.46	111.74	1.48
																																133.58	-11.46	111.75	1.48
																																133.59	-11.46	111.76	1.45
																																133.60	-11.46	111.76	1.48
																																133.61	-11.46	111.77	1.45
																																133.63	-11.46	111.78	1.45
																																133.64	-11.46	111.78	1.45
																																133.65	-11.46	111.79	1.40
																																133.66	-11.46	111.80	1.40
																																133.67	-11.46	111.81	1.37
																																133.68	-11.46	111.81	1.34
																																133.69	-11.46	111.82	1.34
																																133.70	-11.46	111.83	1.31
																																133.71	-11.46	111.83	1.31
																																133.72	-11.46	111.84	1.29
																																133.73	-11.46	111.85	1.26
																																133.74	-11.46	111.85	1.26
																																133.75	-11.46	111.86	1.23
																																133.76	-11.46	111.87	1.23
																																133.77	-11.46	111.88	1.21
																																133.78	-11.46	111.88	1.21
																																133.79	-11.46	111.89	1.18
																																133.80	-11.46	111.90	1.18
																																133.81	-11.46	111.90	1.16
																																133.82	-11.46	111.91	1.13
																																133.83	-11.46	111.92	1.13
																																133.84	-11.46	111.92	1.11
																																133.85	-11.46	111.93	1.11
																																133.86	-11.46	111.94	1.11
																																133.88	-11.46	111.94	1.08
																																133.89	-11.46	111.95	1.08
																																133.90	-12.43	111.96	1.06
																																133.91	-12.43	111.97	1.06
																																133.92	-12.43	111.97	1.06
																																133.93	-12.43	111.98	1.04
																																133.94	-12.43	111.99	1.04
																																133.95	-12.43	111.99	1.04
																																133.96	-12.43	112.00	1.04
																																133.97	-12.43	112.01	1.02
																																133.98	-12.43	112.01	1.02
																																133.99	-12.43	112.02	1.02
																																134.00	-12.43	112.03	1.02
																																134.01	-12.43	112.03	1.02
																																134.02	-12.43	112.04	0.99
																																134.03	-12.43	112.05	0.99
																																134.04	-12.43	112.06	0.99
																																134.05	-12.43	112.06	0.99
																																134.06	-12.43	112.07	0.99
																																134.07	-12.43	112.08	0.97
																																134.08	-12.43	112.08	0.97
																																134.09	-12.43	112.09	0.97
																																134.10	-12.43	112.10	0.97
																																134.11	-12.43	112.10	0.97
																																134.13	-12.43	112.11	0.95
																																134.14	-12.43	112.12	0.95
																																134.15	-12.43	112.13	0.95
																																134.16	-12.43	112.13	0.95
																																134.17	-12.43	112.14	0.95
																																134.18	-12.43	112.15	0.95
																																134.19	-12.43	112.15	0.95
																																134.20	-12.43	112.16	0.93
																																134.21	-12.43	112.17	0.93
																																134.22	-12.43	112.17	0.93
																																134.23	-12.43	112.18	0.93
																																134.24	-12.43	112.19	0.93
																																134.25	-12.43	112.19	0.93
																																134.26	-12.43	112.20	0.93
																																134.27	-12.43	112.21	0.93
																																134.28	-12.43	112.22	0.93
																																134.29	-12.43	112.22	0.93
																																134.30	-12.43	112.23	0.93
																																134.31	-12.43	112.24	0.93
																																134.32	-12.43	112.24	0.93
																																134.33	-12.43	112.25	0.93
																																134.34	-12.43	112.26	0.90
																																134.35	-12.43	112.26	0.90
																																134.36	-12.43	112.27	0.90
																																134.38	-12.43	112.28	0.90
																																134.39	-12.43	112.28	0.90
																																134.40	-12.43	112.29	0.90
																																134.41	-12.43	112.30	0.90
																																134.42	-12.43	112.31	0.90
																																134.43	-12.43	112.31	0.90
																																134.44	-12.43	112.32	0.88
																																134.45	-12.43	112.33	0.88
																																134.46	-12.43	112.33	0.88
																																134.47	-12.43	112.34	0.88
																																134.48	-13.41	112.35	0.88
																																134.49	-13.41	112.35	0.88
																																134.50	-13.41	112.36	0.88
																																134.51	-13.41	112.37	0.88
																																134.52	-13.41	112.38	0.88
																																134.53	-13.41	112.38	0.88
																																134.54	-13.41	112.39	0.88
																																134.55	-13.41	112.40	0.90
																																134.56	-13.41	112.40	0.90
																																134.57	-14.38	112.41	0.90
																																134.58	-14.38	112.42	0.90
																																134.59	-14.38	112.42	0.90
																																134.60	-14.38	112.43	0.93
																																134.61	-14.38	112.44	0.93
																																134.63	-14.38	112.44	0.93
																																134.64	-14.38	112.45	0.97
																																134.65	-14.38	112.46	0.99
																																134.66	-14.38	112.47	1.04
																																134.67	-14.38	112.47	1.04
																																134.68	-14.38	112.48	1.08
																																134.69	-14.38	112.49	1.11
																																134.70	-14.38	112.49	1.11
																																134.71	-14.38	112.50	1.13
																																134.72	-14.38	112.51	1.13
																																134.73	-10.48	112.51	1.16
																																134.74	-10.48	112.52	1.18
																																134.75	-10.48	112.53	1.21
																																134.76	-11.46	112.53	1.21
																																134.77	-11.46	112.54	1.26
																																134.78	-11.46	112.55	1.29
																																134.79	-11.46	112.56	1.29
																																134.80	-11.46	112.56	1.31
																																134.81	-11.46	112.57	1.34
																																134.82	-11.46	112.58	1.34
																																134.83	-11.46	112.58	1.34
																																134.84	-11.46	112.59	1.34
																																134.85	-11.46	112.60	1.37
																																134.86	-11.46	112.60	1.37
																																134.88	-11.46	112.61	1.37
																																134.89	-11.46	112.62	1.40
																																134.90	-11.46	112.63	1.40
																																134.91	-11.46	112.63	1.40
																																134.92	-11.46	112.64	1.40
																																134.93	-11.46	112.65	1.40
																																134.94	-11.46	112.65	1.40
																																134.95	-11.46	112.66	1.37
																																134.96	-11.46	112.67	1.34
																																134.97	-12.43	112.67	1.34
																																134.98	-12.43	112.68	1.31
																																134.99	-12.43	112.69	1.31
																																135.00	-12.43	112.69	1.29
																																135.01	-12.43	112.70	1.26
																																135.02	-12.43	112.71	1.26
																																135.03	-12.43	112.72	1.26
																																135.04	-11.46	112.72	1.26
																																135.05	-11.46	112.73	1.26
																																135.06	-11.46	112.74	1.26
																																135.07	-11.46	112.74	1.26
																																135.08	-11.46	112.75	1.26
																																135.09	-11.46	112.76	1.26
																																135.10	-11.46	112.76	1.26
																																135.11	-11.46	112.77	1.26
																																135.13	-11.46	112.78	1.26
																																135.14	-11.46	112.78	1.26
																																135.15	-11.46	112.79	1.23
																																135.16	-11.46	112.80	1.26
																																135.17	-11.46	112.81	1.23
																																135.18	-11.46	112.81	1.23
																																135.19	-11.46	112.82	1.23
																																135.20	-11.46	112.83	1.21
																																135.21	-11.46	112.83	1.21
																																135.22	-11.46	112.84	1.21
																																135.23	-11.46	112.85	1.18
																																135.24	-11.46	112.85	1.18
																																135.25	-11.46	112.86	1.18
																																135.26	-11.46	112.87	1.18
																																135.27	-11.46	112.88	1.16
																																135.28	-11.46	112.88	1.13
																																135.29	-11.46	112.89	1.13
																																135.30	-11.46	112.90	1.13
																																135.31	-11.46	112.90	1.11
																																135.32	-11.46	112.91	1.11
																																135.33	-11.46	112.92	1.08
																																135.34	-11.46	112.92	1.08
																																135.35	-11.46	112.93	1.08
																																135.36	-11.46	112.94	1.06
																																135.38	-11.46	112.94	1.04
																																135.39	-11.46	112.95	1.04
																																135.40	-11.46	112.96	1.04
																																135.41	-11.46	112.97	1.02
																																135.42	-11.46	112.97	1.02
																																135.43	-12.43	112.98	1.02
																																135.44	-12.43	112.99	1.02
																																135.45	-12.43	112.99	0.99
																																135.46	-12.43	113.00	0.99
																																135.47	-12.43	113.01	0.99
																																135.48	-12.43	113.01	0.99
																																135.49	-12.43	113.02	0.99
																																135.50	-12.43	113.03	0.97
																																135.51	-12.43	113.03	0.97
																																135.52	-12.43	113.04	0.97
																																135.53	-12.43	113.05	0.97
																																135.54	-12.43	113.06	0.97
																																135.55	-13.41	113.06	0.95
																																135.56	-13.41	113.07	0.95
																																135.57	-13.41	113.08	0.95
																																135.58	-13.41	113.08	0.93
																																135.59	-13.41	113.09	0.93
																																135.60	-13.41	113.10	0.93
																																135.61	-13.41	113.10	0.93
																																135.63	-13.41	113.11	0.93
																																135.64	-13.41	113.12	0.93
																																135.65	-13.41	113.13	0.93
																																135.66	-13.41	113.13	0.93
																																135.67	-13.41	113.14	0.93
																																135.68	-13.41	113.15	0.93
																																135.69	-13.41	113.15	0.93
																																135.70	-13.41	113.16	0.93
																																135.71	-13.41	113.17	0.93
																																135.72	-13.41	113.17	0.93
																																135.73	-13.41	113.18	0.93
																																135.74	-13.41	113.19	0.93
																																135.75	-13.41	113.19	0.93
																																135.76	-14.38	113.20	0.93
																																135.77	-14.38	113.21	0.93
																																135.78	-14.38	113.22	0.93
																																135.79	-14.38	113.22	0.93
																																135.80	-14.38	113.23	0.93
																																135.81	-14.38	113.24	0.93
																																135.82	-14.38	113.24	0.93
																																135.83	-14.38	113.25	0.93
																																135.84	-14.38	113.26	0.93
																																135.85	-14.38	113.26	0.93
																																135.86	-14.38	113.27	0.90
																																135.88	-14.38	113.28	0.90
																																135.89	-14.38	113.28	0.90
																																135.90	-14.38	113.29	0.90
																																135.91	-14.38	113.30	0.90
																																135.92	-14.38	113.31	0.90
																																135.93	-14.38	113.31	0.90
																																135.94	-14.38	113.32	0.90
																																135.95	-14.38	113.33	0.90
																																135.96	-14.38	113.33	0.90
																																135.97	-14.38	113.34	0.90
																																135.98	-14.38	113.35	0.88
																																135.99	-14.38	113.35	0.88
																																136.00	-14.38	113.36	0.88
																																136.01	-14.38	113.37	0.88
																																136.02	-14.38	113.38	0.88
																																136.03	-14.38	113.38	0.86
																																136.04	-14.38	113.39	0.86
																																136.05	-13.41	113.40	0.86
																																136.06	-14.38	113.40	0.86
																																136.07	-13.41	113.41	0.86
																																136.08	-14.38	113.42	0.86
																																136.09	-14.38	113.42	0.86
																																136.10	-13.41	113.43	0.88
																																136.11	-13.41	113.44	0.90
																																136.13	-14.38	113.44	0.93
																																136.14	-14.38	113.45	0.95
																																136.15	-13.41	113.46	0.99
																																136.16	-13.41	113.47	1.02
																																136.17	-13.41	113.47	1.06
																																136.18	-14.38	113.48	1.08
																																136.19	-13.41	113.49	1.16
																																136.20	-13.41	113.49	1.18
																																136.21	-13.41	113.50	1.21
																																136.22	-13.41	113.51	1.21
																																136.23	-13.41	113.51	1.23
																																136.24	-14.38	113.52	1.23
																																136.25	-13.41	113.53	1.26
																																136.26	-13.41	113.53	1.26
																																136.27	-13.41	113.54	1.29
																																136.28	-13.41	113.55	1.29
																																136.29	-13.41	113.56	1.29
																																136.30	-13.41	113.56	1.29
																																136.31	-13.41	113.57	1.29
																																136.32	-13.41	113.58	1.29
																																136.33	-13.41	113.58	1.29
																																136.34	-13.41	113.59	1.29
																																136.35	-13.41	113.60	1.31
																																136.36	-13.41	113.60	1.31
																																136.38	-13.41	113.61	1.29
																																136.39	-14.38	113.62	1.29
																																136.40	-14.38	113.63	1.31
																																136.41	-14.38	113.63	1.31
																																136.42	-14.38	113.64	1.31
																																136.43	-14.38	113.65	1.31
																																136.44	-14.38	113.65	1.31
																																136.45	-14.38	113.66	1.31
																																136.46	-14.38	113.67	1.31
																																136.47	-14.38	113.67	1.29
																																136.48	-14.38	113.68	1.26
																																136.49	-14.38	113.69	1.26
																																136.50	-14.38	113.69	1.23
																																136.51	-15.36	113.70	1.23
																																136.52	-15.36	113.71	1.21
																																136.53	-15.36	113.72	1.21
																																136.54	-15.36	113.72	1.18
																																136.55	-15.36	113.73	1.16
																																136.56	-15.36	113.74	1.13
																																136.57	-15.36	113.74	1.13
																																136.58	-15.36	113.75	1.13
																																136.59	-15.36	113.76	1.11
																																136.60	-15.36	113.76	1.08
																																136.61	-15.36	113.77	1.08
																																136.63	-15.36	113.78	1.06
																																136.64	-15.36	113.78	1.04
																																136.65	-15.36	113.79	1.04
																																136.66	-15.36	113.80	1.02
																																136.67	-15.36	113.81	1.02
																																136.68	-15.36	113.81	0.99
																																136.69	-15.36	113.82	0.99
																																136.70	-15.36	113.83	0.99
																																136.71	-15.36	113.83	0.99
																																136.72	-15.36	113.84	0.97
																																136.73	-15.36	113.85	0.97
																																136.74	-16.34	113.85	0.95
																																136.75	-16.34	113.86	0.93
																																136.76	-16.34	113.87	0.90
																																136.77	-16.34	113.88	0.90
																																136.78	-16.34	113.88	0.90
																																136.79	-16.34	113.89	0.88
																																136.80	-16.34	113.90	0.88
																																136.81	-16.34	113.90	0.86
																																136.82	-16.34	113.91	0.86
																																136.83	-16.34	113.92	0.84
																																136.84	-16.34	113.92	0.82
																																136.85	-15.36	113.93	0.82
																																136.86	-14.38	113.94	0.82
																																136.88	-14.38	113.94	0.82
																																136.89	-14.38	113.95	0.80
																																136.90	-14.38	113.96	0.80
																																136.91	-14.38	113.97	0.80
																																136.92	-14.38	113.97	0.80
																																136.93	-14.38	113.98	0.80
																																136.94	-14.38	113.99	0.80
																																136.95	-14.38	113.99	0.78
																																136.96	-14.38	114.00	0.78
																																136.97	-14.38	114.01	0.80
																																136.98	-14.38	114.01	0.78
																																136.99	-14.38	114.02	0.78
																																137.00	-13.41	114.03	0.78
																																137.01	-6.58	114.03	0.78
																																137.02	-6.58	114.04	0.78
																																137.03	-7.55	114.05	0.78
																																137.04	-7.55	114.06	0.78
																																137.05	-8.53	114.06	0.78
																																137.06	-8.53	114.07	0.78
																																137.07	-8.53	114.08	0.78
																																137.08	-8.53	114.08	0.76
																																137.09	-8.53	114.09	0.76
																																137.10	-8.53	114.10	0.76
																																137.11	-9.50	114.10	0.76
																																137.13	-9.50	114.11	0.76
																																137.14	-8.53	114.12	0.76
																																137.15	-8.53	114.13	0.74
																																137.16	-8.53	114.13	0.74
																																137.17	-8.53	114.14	0.74
																																137.18	-8.53	114.15	0.74
																																137.19	-7.55	114.15	0.74
																																137.20	-7.55	114.16	0.73
																																137.21	-7.55	114.17	0.73
																																137.22	-8.53	114.17	0.73
																																137.23	-8.53	114.18	0.73
																																137.24	-8.53	114.19	0.73
																																137.25	-8.53	114.19	0.71
																																137.26	-8.53	114.20	0.71
																																137.27	-8.53	114.21	0.71
																																137.28	-8.53	114.22	0.71
																																137.29	-8.53	114.22	0.71
																																137.30	-9.50	114.23	0.71
																																137.31	-9.50	114.24	0.71
																																137.32	-9.50	114.24	0.71
																																137.33	-9.50	114.25	0.69
																																137.34	-9.50	114.26	0.69
																																137.35	-9.50	114.26	0.69
																																137.36	-9.50	114.27	0.69
																																137.38	-9.50	114.28	0.69
																																137.39	-9.50	114.28	0.69
																																137.40	-9.50	114.29	0.69
																																137.41	-9.50	114.30	0.69
																																137.42	-9.50	114.31	0.69
																																137.43	-8.53	114.31	0.69
																																137.44	-8.53	114.32	0.74
																																137.45	-8.53	114.33	0.71
																																137.46	-8.53	114.33	0.71
																																137.47	-8.53	114.34	0.71
																																137.48	-7.55	114.35	0.69
																																137.49	-7.55	114.35	0.73
																																137.50	-7.55	114.36	0.69
																																137.51	-7.55	114.37	0.71
																																137.52	-7.55	114.38	0.69
																																137.53	-6.58	114.38	0.71
																																137.54	-6.58	114.39	0.71
																																137.55	-6.58	114.40	0.71
																																137.56	-6.58	114.40	0.73
																																137.57	-6.58	114.41	0.73
																																137.58	-6.58	114.42	0.74
																																137.59	-6.58	114.42	0.76
																																137.60	-6.58	114.43	0.78
																																137.61	-6.58	114.44	0.78
																																137.63	-6.58	114.44	0.78
																																137.64	-6.58	114.45	0.78
																																137.65	-6.58	114.46	0.80
																																137.66	-6.58	114.47	0.80
																																137.67	-6.58	114.47	0.82
																																137.68	-6.58	114.48	0.84
																																137.69	-6.58	114.49	0.84
																																137.70	-6.58	114.49	0.84
																																137.71	-6.58	114.50	0.86
																																137.72	-6.58	114.51	0.86
																																137.73	-6.58	114.51	0.86
																																137.74	-6.58	114.52	0.88
																																137.75	-6.58	114.53	0.88
																																137.76	-6.58	114.53	0.88
																																137.77	-6.58	114.54	0.88
																																137.78	-6.58	114.55	0.90
																																137.79	-6.58	114.56	0.90
																																137.80	-6.58	114.56	0.90
																																137.81	-6.58	114.57	0.90
																																137.82	-6.58	114.58	0.90
																																137.83	-6.58	114.58	0.90
																																137.84	-6.58	114.59	0.93
																																137.85	-6.58	114.60	0.93
																																137.86	-6.58	114.60	0.93
																																137.88	-6.58	114.61	0.93
																																137.89	-6.58	114.62	0.93
																																137.90	-6.58	114.63	0.93
																																137.91	-6.58	114.63	0.93
																																137.92	-6.58	114.64	0.93
																																137.93	-6.58	114.65	0.93
																																137.94	-6.58	114.65	0.95
																																137.95	-7.55	114.66	0.95
																																137.96	-7.55	114.67	0.93
																																137.97	-7.55	114.67	0.93
																																137.98	-7.55	114.68	0.93
																																137.99	-7.55	114.69	0.93
																																138.00	-7.55	114.69	0.93
																																138.01	-7.55	114.70	0.93
																																138.02	-7.55	114.71	0.93
																																138.03	-7.55	114.72	0.93
																																138.04	-7.55	114.72	0.90
																																138.05	-7.55	114.73	0.90
																																138.06	-7.55	114.74	0.90
																																138.07	-7.55	114.74	0.88
																																138.08	-7.55	114.75	0.88
																																138.09	-7.55	114.76	0.88
																																138.10	-7.55	114.76	0.86
																																138.11	-7.55	114.77	0.84
																																138.13	-7.55	114.78	0.82
																																138.14	-7.55	114.78	0.80
																																138.15	-7.55	114.79	0.80
																																138.16	-7.55	114.80	0.80
																																138.17	-7.55	114.81	0.78
																																138.18	-7.55	114.81	0.78
																																138.19	-7.55	114.82	0.78
																																138.20	-8.53	114.83	0.78
																																138.21	-8.53	114.83	0.76
																																138.22	-8.53	114.84	0.76
																																138.23	-8.53	114.85	0.76
																																138.24	-8.53	114.85	0.74
																																138.25	-8.53	114.86	0.74
																																138.26	-8.53	114.87	0.74
																																138.27	-8.53	114.88	0.73
																																138.28	-8.53	114.88	0.73
																																138.29	-8.53	114.89	0.71
																																138.30	-8.53	114.90	0.71
																																138.31	-8.53	114.90	0.71
																																138.32	-8.53	114.91	0.69
																																138.33	-8.53	114.92	0.67
																																138.34	-8.53	114.92	0.67
																																138.35	-8.53	114.93	0.67
																																138.36	-8.53	114.94	0.67
																																138.38	-8.53	114.94	0.67
																																138.39	-8.53	114.95	0.67
																																138.40	-8.53	114.96	0.67
																																138.41	-8.53	114.97	0.67
																																138.42	-8.53	114.97	0.67
																																138.43	-8.53	114.98	0.67
																																138.44	-8.53	114.99	0.67
																																138.45	-8.53	114.99	0.67
																																138.46	-8.53	115.00	0.67
																																138.47	-8.53	115.01	0.67
																																138.48	-9.50	115.01	0.67
																																138.49	-9.50	115.02	0.67
																																138.50	-9.50	115.03	0.67
																																138.51	-9.50	115.03	0.67
																																138.52	-9.50	115.04	0.67
																																138.53	-9.50	115.05	0.67
																																138.54	-9.50	115.06	0.67
																																138.55	-9.50	115.06	0.67
																																138.56	-9.50	115.07	0.67
																																138.57	-9.50	115.08	0.67
																																138.58	-9.50	115.08	0.67
																																138.59	-9.50	115.09	0.67
																																138.60	-9.50	115.10	0.67
																																138.61	-9.50	115.10	0.67
																																138.63	-9.50	115.11	0.67
																																138.64	-9.50	115.12	0.65
																																138.65	-9.50	115.13	0.65
																																138.66	-9.50	115.13	0.65
																																138.67	-9.50	115.14	0.65
																																138.68	-9.50	115.15	0.63
																																138.69	-9.50	115.15	0.63
																																138.70	-9.50	115.16	0.63
																																138.71	-9.50	115.17	0.63
																																138.72	-9.50	115.17	0.62
																																138.73	-9.50	115.18	0.62
																																138.74	-9.50	115.19	0.62
																																138.75	-9.50	115.19	0.62
																																138.76	-9.50	115.20	0.62
																																138.77	-10.48	115.21	0.62
																																138.78	-10.48	115.22	0.62
																																138.79	-10.48	115.22	0.62
																																138.80	-10.48	115.23	0.60
																																138.81	-10.48	115.24	0.60
																																138.82	-10.48	115.24	0.60
																																138.83	-10.48	115.25	0.60
																																138.84	-10.48	115.26	0.60
																																138.85	-10.48	115.26	0.60
																																138.86	-10.48	115.27	0.60
																																138.88	-10.48	115.28	0.60
																																138.89	-10.48	115.28	0.60
																																138.90	-10.48	115.29	0.60
																																138.91	-10.48	115.30	0.58
																																138.92	-10.48	115.31	0.58
																																138.93	-10.48	115.31	0.58
																																138.94	-10.48	115.32	0.58
																																138.95	-10.48	115.33	0.58
																																138.96	-10.48	115.33	0.57
																																138.97	-10.48	115.34	0.57
																																138.98	-10.48	115.35	0.57
																																138.99	-10.48	115.35	0.57
																																139.00	-10.48	115.36	0.57
																																139.01	-10.48	115.37	0.57
																																139.02	-10.48	115.38	0.57
																																139.03	-10.48	115.38	0.57
																																139.04	-10.48	115.39	0.57
																																139.05	-10.48	115.40	0.57
																																139.06	-10.48	115.40	0.57
																																139.07	-10.48	115.41	0.57
																																139.08	-10.48	115.42	0.57
																																139.09	-10.48	115.42	0.57
																																139.10	-10.48	115.43	0.57
																																139.11	-10.48	115.44	0.57
																																139.13	-10.48	115.44	0.57
																																139.14	-10.48	115.45	0.58
																																139.15	-10.48	115.46	0.58
																																139.16	-10.48	115.47	0.60
																																139.17	-10.48	115.47	0.62
																																139.18	-10.48	115.48	0.63
																																139.19	-10.48	115.49	0.67
																																139.20	-9.50	115.49	0.67
																																139.21	-8.53	115.50	0.67
																																139.22	-8.53	115.51	0.69
																																139.23	-8.53	115.51	0.69
																																139.24	-7.55	115.52	0.69
																																139.25	-7.55	115.53	0.69
																																139.26	-7.55	115.53	0.69
																																139.27	-8.53	115.54	0.69
																																139.28	-8.53	115.55	0.69
																																139.29	-8.53	115.56	0.69
																																139.30	-8.53	115.56	0.73
																																139.31	-8.53	115.57	0.69
																																139.32	-8.53	115.58	0.69
																																139.33	-8.53	115.58	0.69
																																139.34	-8.53	115.59	0.67
																																139.35	-8.53	115.60	0.67
																																139.36	-8.53	115.60	0.67
																																139.38	-8.53	115.61	0.67
																																139.39	-8.53	115.62	0.67
																																139.40	-8.53	115.63	0.65
																																139.41	-8.53	115.63	0.65
																																139.42	-8.53	115.64	0.65
																																139.43	-9.50	115.65	0.65
																																139.44	-9.50	115.65	0.65
																																139.45	-9.50	115.66	0.65
																																139.46	-9.50	115.67	0.65
																																139.47	-9.50	115.67	0.65
																																139.48	-9.50	115.68	0.63
																																139.49	-9.50	115.69	0.63
																																139.50	-9.50	115.69	0.63
																																139.51	-9.50	115.70	0.65
																																139.52	-9.50	115.71	0.65
																																139.53	-9.50	115.72	0.65
																																139.54	-9.50	115.72	0.67
																																139.55	-9.50	115.73	0.67
																																139.56	-9.50	115.74	0.67
																																139.57	-9.50	115.74	0.67
																																139.58	-9.50	115.75	0.69
																																139.59	-9.50	115.76	0.82
																																139.60	-9.50	115.76	0.93
																																139.61	-9.50	115.77	1.04
																																139.63	-9.50	115.78	1.13
																																139.64	-9.50	115.78	1.18
																																139.65	-9.50	115.79	1.23
																																139.66	-9.50	115.80	1.29
																																139.67	-9.50	115.81	1.34
																																139.68	-9.50	115.81	1.34
																																139.69	-9.50	115.82	1.37
																																139.70	-9.50	115.83	1.42
																																139.71	-10.48	115.83	1.45
																																139.72	-10.48	115.84	1.48
																																139.73	-10.48	115.85	1.51
																																139.74	-10.48	115.85	1.54
																																139.75	-10.48	115.86	1.60
																																139.76	-10.48	115.87	1.63
																																139.77	-10.48	115.88	1.72
																																139.78	-10.48	115.88	1.72
																																139.79	-10.48	115.89	1.79
																																139.80	-10.48	115.90	1.85
																																139.81	-10.48	115.90	2.02
																																139.82	-10.48	115.91	2.09
																																139.83	-10.48	115.92	2.20
																																139.84	-10.48	115.92	2.38
																																139.85	-10.48	115.93	2.62
																																139.86	-10.48	115.94	2.79
																																139.88	-10.48	115.94	2.99
																																139.89	-10.48	115.95	3.13
																																139.90	-10.48	115.96	3.13
																																139.91	-10.48	115.97	3.18
																																139.92	-10.48	115.97	3.18
																																139.93	-10.48	115.98	3.18
																																139.94	-10.48	115.99	3.22
																																139.95	-10.48	115.99	3.22
																																139.96	-10.48	116.00	3.18
																																139.97	-10.48	116.01	3.18
																																139.98	-10.48	116.01	3.13
																																139.99	-10.48	116.02	3.13
																																140.00	-10.48	116.03	3.04
																																140.01	-10.48	116.03	2.99
																																140.02	-10.48	116.04	2.99
																																140.03	-10.48	116.05	2.99
																																140.04	-10.48	116.06	2.99
																																140.05	-10.48	116.06	3.08
																																140.06	-10.48	116.07	3.13
																																140.07	-10.48	116.08	3.22
																																140.08	-10.48	116.08	3.32
																																140.09	-10.48	116.09	3.36
																																140.10	-10.48	116.10	3.45
																																140.11	-10.48	116.10	3.50
																																140.13	-10.48	116.11	3.60
																																140.14	-10.48	116.12	3.65
																																140.15	-10.48	116.13	3.75
																																140.16	-10.48	116.13	3.75
																																140.17	-10.48	116.14	3.80
																																140.18	-10.48	116.15	3.80
																																140.19	-10.48	116.15	3.75
																																140.20	-10.48	116.16	3.70
																																140.21	-10.48	116.17	3.65
																																140.22	-10.48	116.17	3.65
																																140.23	-10.48	116.18	3.60
																																140.24	-10.48	116.19	3.55
																																140.25	-10.48	116.19	3.55
																																140.26	-10.48	116.20	3.50
																																140.27	-10.48	116.21	3.50
																																140.28	-10.48	116.22	3.45
																																140.29	-10.48	116.22	3.41
																																140.30	-10.48	116.23	3.36
																																140.31	-10.48	116.24	3.36
																																140.32	-10.48	116.24	3.32
																																140.33	-10.48	116.25	3.32
																																140.34	-10.48	116.26	3.32
																																140.35	-10.48	116.26	3.27
																																140.36	-10.48	116.27	3.36
																																140.38	-10.48	116.28	3.32
																																140.39	-10.48	116.28	3.32
																																140.40	-11.46	116.29	3.32
																																140.41	-10.48	116.30	3.32
																																140.42	-10.48	116.31	3.36
																																140.43	-11.46	116.31	3.32
																																140.44	-11.46	116.32	3.36
																																140.45	-11.46	116.33	3.36
																																140.46	-11.46	116.33	3.36
																																140.47	-11.46	116.34	3.36
																																140.48	-11.46	116.35	3.36
																																140.49	-11.46	116.35	3.36
																																140.50	-11.46	116.36	3.41
																																140.51	-11.46	116.37	3.41
																																140.52	-11.46	116.38	3.41
																																140.53	-11.46	116.38	3.41
																																140.54	-11.46	116.39	3.41
																																140.55	-11.46	116.40	3.45
																																140.56	-11.46	116.40	3.45
																																140.57	-11.46	116.41	3.45
																																140.58	-11.46	116.42	3.45
																																140.59	-11.46	116.42	3.50
																																140.60	-11.46	116.43	3.50
																																140.61	-11.46	116.44	3.50
																																140.63	-11.46	116.44	3.50
																																140.64	-11.46	116.45	3.50
																																140.65	-11.46	116.46	3.50
																																140.66	-11.46	116.47	3.50
																																140.67	-11.46	116.47	3.50
																																140.68	-11.46	116.48	3.50
																																140.69	-11.46	116.49	3.50
																																140.70	-11.46	116.49	3.45
																																140.71	-11.46	116.50	3.45
																																140.72	-11.46	116.51	3.45
																																140.73	-11.46	116.51	3.41
																																140.74	-11.46	116.52	3.41
																																140.75	-11.46	116.53	3.36
																																140.76	-11.46	116.53	3.32
																																140.77	-11.46	116.54	3.32
																																140.78	-11.46	116.55	3.32
																																140.79	-11.46	116.56	3.27
																																140.80	-11.46	116.56	3.27
																																140.81	-11.46	116.57	3.27
																																140.82	-11.46	116.58	3.27
																																140.83	-11.46	116.58	3.27
																																140.84	-11.46	116.59	3.27
																																140.85	-11.46	116.60	3.27
																																140.86	-11.46	116.60	3.27
																																140.88	-11.46	116.61	3.27
																																140.89	-11.46	116.62	3.27
																																140.90	-11.46	116.63	3.27
																																140.91	-11.46	116.63	3.27
																																140.92	-11.46	116.64	3.27
																																140.93	-11.46	116.65	3.27
																																140.94	-11.46	116.65	3.27
																																140.95	-11.46	116.66	3.27
																																140.96	-11.46	116.67	3.27
																																140.97	-11.46	116.67	3.27
																																140.98	-11.46	116.68	3.27
																																140.99	-11.46	116.69	3.27
																																141.00	-11.46	116.69	3.27
																																141.01	-11.46	116.70	3.32
																																141.02	-11.46	116.71	3.32
																																141.03	-11.46	116.72	3.32
																																141.04	-11.46	116.72	3.36
																																141.05	-11.46	116.73	3.36
																																141.06	-11.46	116.74	3.36
																																141.07	-11.46	116.74	3.36
																																141.08	-10.48	116.75	3.41
																																141.09	-9.50	116.76	3.45
																																141.10	-9.50	116.76	3.50
																																141.11	-9.50	116.77	3.55
																																141.13	-9.50	116.78	3.55
																																141.14	-9.50	116.78	3.65
																																141.15	-9.50	116.79	3.70
																																141.16	-8.53	116.80	3.70
																																141.17	-8.53	116.81	3.70
																																141.18	-8.53	116.81	3.75
																																141.19	-8.53	116.82	3.70
																																141.20	-8.53	116.83	3.75
																																141.21	-7.55	116.83	3.75
																																141.22	-7.55	116.84	3.80
																																141.23	-7.55	116.85	3.85
																																141.24	-7.55	116.85	3.85
																																141.25	-7.55	116.86	3.85
																																141.26	-6.58	116.87	3.85
																																141.27	-6.58	116.88	3.85
																																141.28	-6.58	116.88	3.85
																																141.29	-6.58	116.89	3.85
																																141.30	-6.58	116.90	3.85
																																141.31	-6.58	116.90	3.85
																																141.32	-6.58	116.91	3.85
																																141.33	-6.58	116.92	3.80
																																141.34	-6.58	116.92	3.80
																																141.35	-6.58	116.93	3.80
																																141.36	-6.58	116.94	3.80
																																141.38	-6.58	116.94	3.80
																																141.39	-6.58	116.95	3.80
																																141.40	-6.58	116.96	3.80
																																141.41	-5.60	116.97	3.75
																																141.42	-6.58	116.97	3.75
																																141.43	-6.58	116.98	3.75
																																141.44	-6.58	116.99	3.75
																																141.45	-6.58	116.99	3.70
																																141.46	-6.58	117.00	3.70
																																141.47	-6.58	117.01	3.70
																																141.48	-6.58	117.01	3.70
																																141.49	-6.58	117.02	3.70
																																141.50	-6.58	117.03	3.65
																																141.51	-6.58	117.03	3.65
																																141.52	-6.58	117.04	3.65
																																141.53	-6.58	117.05	3.60
																																141.54	-6.58	117.06	3.60
																																141.55	-6.58	117.06	3.60
																																141.56	-5.60	117.07	3.55
																																141.57	-5.60	117.08	3.55
																																141.58	-5.60	117.08	3.55
																																141.59	-5.60	117.09	3.55
																																141.60	-5.60	117.10	3.55
																																141.61	-5.60	117.10	3.50
																																141.63	-5.60	117.11	3.50
																																141.64	-5.60	117.12	3.50
																																141.65	-5.60	117.13	3.50
																																141.66	-6.58	117.13	3.50
																																141.67	-5.60	117.14	3.50
																																141.68	-5.60	117.15	3.45
																																141.69	-5.60	117.15	3.45
																																141.70	-6.58	117.16	3.45
																																141.71	-5.60	117.17	3.41
																																141.72	-6.58	117.17	3.41
																																141.73	-6.58	117.18	3.41
																																141.74	-6.58	117.19	3.36
																																141.75	-6.58	117.19	3.36
																																141.76	-6.58	117.20	3.32
																																141.77	-6.58	117.21	3.32
																																141.78	-6.58	117.22	3.32
																																141.79	-6.58	117.22	3.27
																																141.80	-6.58	117.23	3.27
																																141.81	-6.58	117.24	3.27
																																141.82	-6.58	117.24	3.22
																																141.83	-6.58	117.25	3.22
																																141.84	-6.58	117.26	3.18
																																141.85	-6.58	117.26	3.18
																																141.86	-6.58	117.27	3.18
																																141.88	-6.58	117.28	3.13
																																141.89	-6.58	117.28	3.13
																																141.90	-6.58	117.29	3.13
																																141.91	-7.55	117.30	3.08
																																141.92	-7.55	117.31	3.08
																																141.93	-7.55	117.31	3.04
																																141.94	-7.55	117.32	3.04
																																141.95	-7.55	117.33	3.04
																																141.96	-7.55	117.33	3.04
																																141.97	-7.55	117.34	2.99
																																141.98	-7.55	117.35	2.99
																																141.99	-7.55	117.35	2.99
																																142.00	-7.55	117.36	2.95
																																142.01	-7.55	117.37	2.95
																																142.02	-7.55	117.38	2.95
																																142.03	-7.55	117.38	2.95
																																142.04	-7.55	117.39	2.95
																																142.05	-7.55	117.40	2.91
																																142.06	-7.55	117.40	2.91
																																142.07	-7.55	117.41	2.91
																																142.08	-8.53	117.42	2.91
																																142.09	-8.53	117.42	2.91
																																142.10	-8.53	117.43	2.91
																																142.11	-8.53	117.44	2.91
																																142.13	-8.53	117.44	2.91
																																142.14	-8.53	117.45	2.86
																																142.15	-8.53	117.46	2.86
																																142.16	-8.53	117.47	2.86
																																142.17	-8.53	117.47	2.86
																																142.18	-8.53	117.48	2.86
																																142.19	-8.53	117.49	2.82
																																142.20	-8.53	117.49	2.82
																																142.21	-8.53	117.50	2.82
																																142.22	-8.53	117.51	2.82
																																142.23	-8.53	117.51	2.82
																																142.24	-8.53	117.52	2.82
																																142.25	-8.53	117.53	2.79
																																142.26	-8.53	117.53	2.79
																																142.27	-8.53	117.54	2.79
																																142.28	-8.53	117.55	2.79
																																142.29	-8.53	117.56	2.79
																																142.30	-8.53	117.56	2.74
																																142.31	-8.53	117.57	2.74
																																142.32	-8.53	117.58	2.74
																																142.33	-8.53	117.58	2.70
																																142.34	-8.53	117.59	2.70
																																142.35	-8.53	117.60	2.70
																																142.36	-8.53	117.60	2.70
																																142.38	-8.53	117.61	2.66
																																142.39	-8.53	117.62	2.66
																																142.40	-8.53	117.63	2.66
																																142.41	-8.53	117.63	2.62
																																142.42	-8.53	117.64	2.62
																																142.43	-8.53	117.65	2.62
																																142.44	-8.53	117.65	2.62
																																142.45	-9.50	117.66	2.58
																																142.46	-9.50	117.67	2.62
																																142.47	-9.50	117.67	2.58
																																142.48	-9.50	117.68	2.58
																																142.49	-9.50	117.69	2.58
																																142.50	-9.50	117.69	2.54
																																142.51	-9.50	117.70	2.54
																																142.52	-9.50	117.71	2.54
																																142.53	-9.50	117.72	2.50
																																142.54	-9.50	117.72	2.50
																																142.55	-9.50	117.73	2.50
																																142.56	-9.50	117.74	2.46
																																142.57	-9.50	117.74	2.46
																																142.58	-9.50	117.75	2.46
																																142.59	-9.50	117.76	2.42
																																142.60	-9.50	117.76	2.42
																																142.61	-9.50	117.77	2.42
																																142.63	-9.50	117.78	2.42
																																142.64	-9.50	117.78	2.38
																																142.65	-9.50	117.79	2.38
																																142.66	-9.50	117.80	2.38
																																142.67	-9.50	117.81	2.38
																																142.68	-8.53	117.81	2.34
																																142.69	-8.53	117.82	2.34
																																142.70	-8.53	117.83	2.34
																																142.71	-8.53	117.83	2.34
																																142.72	-8.53	117.84	2.30
																																142.73	-7.55	117.85	2.30
																																142.74	-7.55	117.85	2.30
																																142.75	-6.58	117.86	2.30
																																142.76	-6.58	117.87	2.30
																																142.77	-6.58	117.88	2.27
																																142.78	-6.58	117.88	2.27
																																142.79	-6.58	117.89	2.27
																																142.80	-6.58	117.90	2.27
																																142.81	-6.58	117.90	2.23
																																142.82	-6.58	117.91	2.23
																																142.83	-6.58	117.92	2.23
																																142.84	-6.58	117.92	2.23
																																142.85	-6.58	117.93	2.23
																																142.86	-7.55	117.94	2.20
																																142.88	-7.55	117.94	2.20
																																142.89	-7.55	117.95	2.20
																																142.90	-6.58	117.96	2.20
																																142.91	-7.55	117.97	2.20
																																142.92	-7.55	117.97	2.16
																																142.93	-7.55	117.98	2.16
																																142.94	-7.55	117.99	2.16
																																142.95	-6.58	117.99	2.16
																																142.96	-6.58	118.00	2.16
																																142.97	-6.58	118.01	2.12
																																142.98	-6.58	118.01	2.12
																																142.99	-6.58	118.02	2.12
																																143.00	-6.58	118.03	2.09
																																143.01	-7.55	118.03	2.09
																																143.02	-7.55	118.04	2.09
																																143.03	-7.55	118.05	2.09
																																143.04	-7.55	118.06	2.09
																																143.05	-7.55	118.06	2.05
																																143.06	-7.55	118.07	2.05
																																143.07	-7.55	118.08	2.05
																																143.08	-7.55	118.08	2.05
																																143.09	-7.55	118.09	2.05
																																143.10	-7.55	118.10	2.02
																																143.11	-7.55	118.10	2.02
																																143.13	-7.55	118.11	2.02
																																143.14	-7.55	118.12	2.02
																																143.15	-7.55	118.13	2.02
																																143.16	-7.55	118.13	1.98
																																143.17	-7.55	118.14	1.98
																																143.18	-7.55	118.15	1.98
																																143.19	-7.55	118.15	1.98
																																143.20	-7.55	118.16	1.98
																																143.21	-7.55	118.17	1.95
																																143.22	-7.55	118.17	1.95
																																143.23	-7.55	118.18	1.95
																																143.24	-7.55	118.19	1.95
																																143.25	-7.55	118.19	1.95
																																143.26	-7.55	118.20	1.95
																																143.27	-7.55	118.21	1.95
																																143.28	-7.55	118.22	1.91
																																143.29	-7.55	118.22	1.91
																																143.30	-7.55	118.23	1.91
																																143.31	-7.55	118.24	1.91
																																143.32	-7.55	118.24	1.91
																																143.33	-7.55	118.25	1.91
																																143.34	-7.55	118.26	1.91
																																143.35	-7.55	118.26	1.91
																																143.36	-7.55	118.27	1.91
																																143.38	-7.55	118.28	1.88
																																143.39	-7.55	118.28	1.88
																																143.40	-7.55	118.29	1.88
																																143.41	-7.55	118.30	1.88
																																143.42	-6.58	118.31	1.88
																																143.43	-6.58	118.31	1.85
																																143.44	-6.58	118.32	1.85
																																143.45	-5.60	118.33	1.85
																																143.46	-5.60	118.33	1.85
																																143.47	-5.60	118.34	1.85
																																143.48	-5.60	118.35	1.85
																																143.49	-5.60	118.35	1.85
																																143.50	-5.60	118.36	1.81
																																143.51	-6.58	118.37	1.81
																																143.52	-6.58	118.38	1.81
																																143.53	-6.58	118.38	1.81
																																143.54	-6.58	118.39	1.81
																																143.55	-6.58	118.40	1.81
																																143.56	-6.58	118.40	1.79
																																143.57	-6.58	118.41	1.79
[truncated: 30,274 more rows]
