# Supplementary material for: Changes in dissolved organic matter quality in a peatland and forest headwater stream as a function of seasonality and hydrologic conditions
Source: Copernicus journal article supplement (doi:10.5194/hess-21-2035-2017), 2017-04-13
Supplement: Supplementary file 1 [file hess-21-2035-2017-supplement.zip › data_Broder_event.csv]

event	site	DOC	abs 254	SUVA	SR	FI	HIX	C1%	C2%	C3%	C4%	C5%		Abbreviations
Snowmelt	forest	10.63	103.29	4.22	2.01	1.69	0.93	45.00	27.00	22.00	0.00	7.00
Snowmelt	forest	11.22	116.55	4.51	1.98	1.67	0.86	43.00	26.00	21.00	0.00	10.00		DOC	DOC [mg L-1]
Snowmelt	forest	11.69	117.45	4.36	2.04	1.69	0.87	44.00	27.00	21.00	0.00	9.00		abs 254	absorbance at 254 nm [m-1]
Snowmelt	forest	11.30	110.13	4.23	2.17	1.70	0.81	42.00	25.00	20.00	0.00	12.00		SUVA	abs 254/DOC [L mg C-1 m-1] after Weishaar et al. 2003
Snowmelt	forest	10.15	97.00	4.15	2.04	1.67	0.84	43.00	27.00	20.00	0.00	10.00		SR	spectral slope ratio after Helms et al. 2008
Snowmelt	forest		113.31		1.97	1.66	0.89	44.00	28.00	20.00	0.00	8.00		FI	fluorescence index after Cory and McKnight 2005
Snowmelt	forest		127.82		1.96	1.64	0.89	43.00	28.00	20.00	0.00	9.00		HIX	humification index after Ohno 2002
Snowmelt	bog	7.85	79.66	4.40	1.78	1.54	0.85	45.40	23.50	12.90	8.40	9.80		C1%	PARAFAC component 1 in percent
Snowmelt	bog	6.60	67.29	4.43	1.83	1.60	0.81	42.10	22.60	14.20	8.70	12.40		C2%	PARAFAC component 2 in percent
Snowmelt	bog	5.14	49.33	4.17	1.86	1.67	0.81	44.40	22.70	13.60	7.20	12.20		C3%	PARAFAC component 3 in percent
Snowmelt	bog	5.04	45.46	3.92	1.88	1.58	0.76	40.70	22.20	14.60	6.50	16.10		C4%	PARAFAC component 4 in percent
Snowmelt	bog	5.01	49.33	4.28	1.81	1.66	0.91	46.60	25.80	14.80	3.80	9.00		C5%	PARAFAC component 5 in percent
spring dry	forest					1.60	0.85	42.40	23.30	12.80	8.90	12.60
spring dry	forest	25.90	308.97	5.18	1.75	1.58	0.91	42.70	29.10	14.60	7.30	6.30
spring dry	forest	26.53	311.32	5.09	1.75	1.62	0.92	43.40	29.40	15.00	7.10	5.20
spring dry	forest	26.33
spring dry	forest	29.18	310.91	4.63	1.79	1.65	0.86	41.80	27.10	15.90	6.50	8.70
spring dry	forest	31.73	336.47	4.60	1.77	1.60	0.94	43.40	29.60	17.50	4.80	4.60
spring dry	forest	29.63	341.44	5.00	1.77	1.59	0.91	42.50	28.90	17.00	5.50	6.10
spring dry	forest	28.16	312.01	4.81	1.78	1.66	0.92	42.30	28.90	17.00	6.40	5.30
spring dry	forest	29.19	323.89	4.82	1.82	1.60	0.94	43.80	29.60	18.50	3.50	4.60
spring dry	forest	29.08	317.68	4.74	1.85	1.64	0.93	44.10	29.00	19.10	2.70	5.10
spring dry	forest	27.62	309.94	4.87	1.85
spring dry	forest	26.70	306.48	4.98	1.86	1.64	0.90	42.70	28.80	19.60	2.70	6.10
spring dry	forest	25.76	306.62	5.17	1.86
spring dry	forest	25.38	290.04	4.96	1.88	1.63	0.90	42.50	28.70	18.70	3.40	6.70
spring dry	forest	25.82	297.64	5.01	1.84
spring dry	forest	25.93	299.02	5.01	1.85
spring dry	forest	25.79	295.15	4.97	1.83
spring dry	forest	23.57	272.49	5.02	1.78
spring dry	forest	25.94	297.50	4.98	1.79
spring dry	forest	27.17	315.60	5.04	1.79
spring dry	forest	26.55	316.57	5.18	1.79
spring dry	forest	26.93	317.40	5.12	1.77
spring dry	forest	26.88	314.08	5.07	1.76
spring dry	forest	26.23	306.35	5.07	1.75
spring dry	forest	26.48	305.79	5.01	1.79
spring dry	bog	26.22	278.43	4.61	1.76	1.61	0.95	44.70	28.70	13.50	9.10	4.00
spring dry	bog	26.77	290.32	4.71	1.74	1.55	0.92	43.40	28.00	13.40	9.70	5.50
spring dry	bog	26.43	285.48	4.69	1.73	1.54	0.92	43.50	28.20	13.60	9.40	5.20
spring dry	bog	25.82	259.92	4.37	1.71	1.65	0.90	42.20	27.00	14.00	10.60	6.20
spring dry	bog	25.60	267.38	4.53	1.72	1.60	0.91	42.90	26.80	14.10	10.40	5.90
spring dry	bog	24.61	259.23	4.57	1.72	1.56	0.91	42.60	28.10	14.70	9.10	5.40
spring dry	bog	23.00	245.41	4.63	1.70	1.62	0.90	43.60	26.80	14.30	8.80	6.40
spring dry	bog	23.61	236.29	4.35	1.71	1.66	0.88	42.90	26.10	14.20	9.10	7.60
spring dry	bog	21.85				1.63	0.95	44.60	28.00	14.90	8.50	3.90
spring dry	bog	23.05	224.96	4.24	1.83
spring dry	bog	22.70	239.05	4.57	1.85
spring dry	bog	22.74	239.19	4.57	1.87
spring dry	bog	23.23	241.26	4.51	1.90	1.63	0.93	45.60	26.40	13.60	8.70	5.70
springbetween	forest	20.51	237.49	5.03	1.91
springbetween	forest	20.79	243.57	5.09	1.89
springbetween	forest	21.00	248.36	5.14	1.88
springbetween	forest	20.91	244.76	5.08	1.88
springbetween	forest	20.97	242.92	5.03	1.86
springbetween	forest	20.69	240.71	5.05	1.87
springbetween	forest	20.71	239.42	5.02	1.89
springbetween	forest	21.67	237.76	4.76	1.87
springbetween	forest	21.06	241.63	4.98	1.85
springbetween	forest	20.42	181.84	3.87	1.94
springbetween	forest	20.46	238.78	5.07	1.85
springbetween	forest	21.03	233.62	4.82	1.83
springbetween	forest	17.91	209.94	5.09	1.81
springbetween	forest	18.01	208.84	5.03	1.78
springbetween	forest	19.12	221.73	5.04	1.78
springbetween	forest	20.65	232.51	4.89	1.76
springbetween	forest	18.99	226.06	5.17	1.77
springbetween	forest	18.57	222.84	5.21	1.75
springbetween	forest	18.35	222.56	5.27	1.74
springbetween	forest	18.98	231.87	5.30	1.72
springbetween	forest	19.77	234.17	5.14	1.72
springbetween	forest	19.35	234.81	5.27	1.72
springbetween	forest	19.33	236.20	5.30	1.73
springbetween	forest	19.41	231.77	5.15	1.73
springbetween	forest	19.54	201.74	4.51	1.78
springbetween	bog	10.54	110.27	4.54	1.74	1.57	0.76	39.90	23.90	14.20	7.50	14.50
springbetween	bog	10.61	94.98	3.89	1.70
springbetween	bog	10.91	93.73	3.73	1.69
springbetween	bog	11.17	104.79	4.07	1.68
springbetween	bog	11.38	116.76	4.46	1.69
springbetween	bog	11.65	127.63	4.76	1.71	1.52	0.84	41.60	26.30	14.40	7.90	9.70
springbetween	bog	11.36	129.80	4.96	1.73	1.55	0.85	42.50	25.70	13.90	8.60	9.30
springbetween	bog	11.50	133.44	5.04	1.71
springbetween	bog	11.86	138.50	5.07	1.72
springbetween	bog	9.40	93.00	4.30	1.83
springbetween	bog	12.16	139.88	4.99	1.71
springbetween	bog	12.46	144.04	5.02	1.67
springbetween	bog	12.15	143.32	5.12	1.68	1.47	0.85	42.50	26.30	14.10	8.40	8.70
springbetween	bog	13.03	152.44	5.08	1.65
springbetween	bog	13.00	152.55	5.09	1.66
springbetween	bog	13.38	156.75	5.09	1.66
springbetween	bog	13.16	155.81	5.14	1.69
springbetween	bog	13.54	160.51	5.15	1.68
springbetween	bog	14.52	174.52	5.22	1.64
springbetween	bog	13.80	164.64	5.18	1.64
springbetween	bog	13.98	166.78	5.18	1.65
springbetween	bog	13.95	167.34	5.21	1.65
springbetween	bog	13.96	165.95	5.16	1.66
springbetween	bog	14.60	130.63	3.88	1.77
springbetween	bog	14.01	168.37	5.22	1.67
spring wet	forest	18.92	225.23	5.17	1.73
spring wet	forest	19.25	232.42	5.24	1.72
spring wet	forest	18.85	228.37	5.26	1.68	1.57	0.94	42.60	30.30	15.80	5.70	5.60
spring wet	forest	17.98	227.26	5.49	1.69	1.60	0.94	43.10	30.20	15.70	5.40	5.50
spring wet	forest	18.32	216.57	5.13	1.77	1.62	0.95	43.40	31.00	18.30	2.20	5.30
spring wet	forest	17.89	203.49	4.94	1.84	1.62	0.87	41.60	29.70	18.60	2.30	7.80
spring wet	forest	18.01	208.28	5.02	1.86	1.62	0.90	42.50	30.60	19.30	0.70	7.00
spring wet	forest	21.25	241.17	4.93	1.86	1.59	0.91	42.80	30.40	20.10	0.20	6.50
spring wet	forest	21.27	249.37	5.09	1.87	1.60	0.93	43.10	31.30	20.40	0.00	5.20
spring wet	forest	18.62	209.94	4.90	1.87	1.54	0.90	42.60	30.70	19.90	0.10	6.80
spring wet	forest	19.57	222.01	4.93	1.88	1.60	0.89	41.80	30.10	20.30	0.00	7.80
spring wet	forest	21.68	236.93	4.75	1.87	1.68	0.94	42.50	31.50	20.10	0.00	6.00
spring wet	forest	20.97	250.20	5.18	1.86
spring wet	forest	21.17	247.89	5.08	1.86
spring wet	forest	21.71	255.63	5.11	1.86	1.62	0.89	42.00	30.70	19.80	0.00	7.50
spring wet	forest	22.16	261.71	5.13	1.86
spring wet	forest	22.71	265.95	5.08	1.86
spring wet	forest	22.92	270.92	5.13	1.85
spring wet	forest	22.37	266.78	5.18	1.85	1.64	0.87	41.40	30.10	20.50	0.00	8.00
spring wet	forest	22.46	270.37	5.23	1.82
spring wet	forest	22.72	271.20	5.18	1.83
spring wet	forest	23.13	280.87	5.27	1.83	1.68	0.89	41.90	31.20	19.80	0.60	6.50
spring wet	forest	22.85	279.40	5.31	1.83
spring wet	bog	18.44	203.12	4.78	1.60	1.55	0.86	42.40	28.00	13.50	7.80	8.20
spring wet	bog	17.25	182.77	4.60	1.58	1.58	0.88	40.80	30.10	14.30	7.20	7.50
spring wet	bog	12.67	132.84	4.55	1.63	1.57	0.89	42.50	28.80	15.60	6.00	7.10
spring wet	bog	11.39	118.90	4.53	1.70	1.56	0.84	41.70	26.10	14.30	7.90	10.00
spring wet	bog	10.10	111.10	4.77	1.69	1.56	0.84	41.30	26.80	14.80	7.50	9.60
spring wet	bog	10.44	115.59	4.81	1.72	1.57	0.84	42.90	25.80	14.90	6.60	9.80
spring wet	bog	10.71	123.60	5.01	1.71	1.69	0.84	42.90	25.90	14.80	6.90	9.50
spring wet	bog	9.40	102.18	4.72	1.70	1.59	0.84	41.90	26.10	16.60	5.60	9.80
spring wet	bog	11.85	117.94	4.32	1.66	1.57	0.82	41.00	27.20	15.40	5.70	10.70
spring wet	bog	12.01	125.40	4.53	1.67	1.57	0.83	41.60	26.90	14.60	6.80	10.10
spring wet	bog	12.34	128.02	4.51	1.67
spring wet	bog	12.74	132.45	4.52	1.64
spring wet	bog	12.75	134.52	4.58	1.66	1.53	0.86	42.20	28.30	15.00	6.30	8.30
spring wet	bog	13.11	138.04	4.57	1.67
spring wet	bog	13.12	140.32	4.64	1.65
spring wet	bog	13.43	142.74	4.61	1.66
spring wet	bog	13.38	145.37	4.72	1.65	1.54	0.84	42.00	27.40	14.60	6.90	9.10
spring wet	bog	13.73	149.65	4.73	1.65
spring wet	bog	13.89	151.24	4.73	1.64
spring wet	bog	14.31	153.24	4.65	1.66	1.54	0.87	43.50	27.30	14.40	6.60	8.20
spring wet	bog	14.53	153.59	4.59	1.67
fall dry	forest	34.75	329.70	4.12	1.94
fall dry	forest	38.16	362.45	4.12	1.99	1.73	0.92	44.10	26.70	20.60	3.50	5.10
fall dry	forest	35.38	349.73	4.29	1.90	1.66	0.93	45.80	25.10	13.60	10.90	4.70
fall dry	forest	34.71	350.29	4.38	1.90	1.62	0.92	44.80	25.30	13.30	11.00	5.70
fall dry	forest	33.52	342.96	4.44	1.90	1.61	0.93	45.40	25.90	13.90	10.30	4.50
fall dry	forest	33.85	336.74	4.32	1.92	1.64	0.93	44.90	26.00	13.60	10.60	4.90
fall dry	forest	33.99	347.66	4.44	1.90	1.70	0.92	45.50	25.50	13.60	10.50	4.90
fall dry	forest	32.16	284.37	3.84	1.93	1.65	0.93	44.30	25.70	13.40	11.90	4.70
fall dry	forest	33.18	295.71	3.87	1.80	1.68	0.91	43.00	25.60	13.60	12.90	4.80
fall dry	forest	39.38	392.15	4.32	1.84	1.69	0.91	43.00	26.40	15.90	9.00	5.80
fall dry	forest	42.80	386.21	3.92	1.89	1.59	0.92	41.70	27.00	17.10	9.40	4.80
fall dry	forest	44.11	399.20	3.93	1.89	1.65	0.92	42.60	26.90	18.40	7.50	4.60
fall dry	forest	43.42	413.43	4.13	1.91	1.64	0.92	42.10	27.00	18.50	7.40	5.00
fall dry	forest	42.83	444.02	4.50	1.91	1.63	0.93	44.00	27.70	18.70	5.40	4.30
fall dry	forest	42.06	422.09	4.36	1.91	1.67	0.94	43.50	28.00	18.70	5.80	4.00
fall dry	forest	38.43	390.59	4.41	1.88	1.64	0.96	45.00	27.50	17.00	7.20	3.30
fall dry	forest	42.56	395.19	4.03	1.87	1.59	0.93	42.90	28.00	17.20	7.40	4.50
fall dry	forest	45.80	488.79	4.63	1.90	1.68	0.93	43.10	27.90	18.40	5.60	4.90
fall dry	forest	44.17	430.38	4.23	1.93	1.69	0.93	43.10	27.50	18.60	6.60	4.20
fall dry	forest	41.61	421.54	4.40	1.86
fall dry	forest	41.25	295.71	3.11	1.85
fall dry	forest	43.41	464.28	4.64	1.91
fall dry	forest	40.68	358.90	3.83	1.88
fall dry	forest	37.14	376.40	4.40	1.89
fall dry	forest	37.87	342.50	3.93	1.94
fall dry	bog	34.50	332.60	4.19	1.93
fall dry	bog	33.49	343.38	4.45	1.94	1.57	0.93	45.90	24.70	12.70	12.00	4.70
fall dry	bog	33.52	332.32	4.30	1.95	1.55	0.93	46.00	24.80	12.10	12.80	4.30
fall dry	bog	33.01	350.29	4.61	1.93	1.63	0.93	46.00	25.10	12.50	12.20	4.30
fall dry	bog	33.20	339.23	4.44	1.92	1.61	0.93	45.60	24.90	12.30	12.50	4.70
fall dry	bog	32.43	319.75	4.28	1.95	1.57	0.94	45.40	24.90	12.20	13.50	4.00
fall dry	bog	30.15	288.66	4.16	1.86	1.63	0.92	43.90	26.50	13.00	11.90	4.70
fall dry	bog	34.04	349.32	4.46	1.85	1.60	0.92	44.10	26.10	14.10	10.70	5.00
fall dry	bog	36.81	348.49	4.11	1.88	1.58	0.92	43.90	25.90	14.40	11.00	4.80
fall dry	bog
fall dry	bog
fall dry	bog	34.85	337.44	4.20	1.93	1.68	0.93	44.70	25.30	14.40	11.20	4.30
fall dry	bog	34.64	337.57	4.23	1.91	1.67	0.93	45.60	24.20	14.80	11.70	3.70
fall dry	bog	36.90	332.74	3.92	1.87	1.67	0.93	45.80	24.20	14.00	11.90	4.00
fall dry	bog	35.34	335.78	4.13	1.84	1.63	0.94	45.30	25.30	14.70	10.90	3.80
fall dry	bog	37.29	364.52	4.24	1.82	1.68	0.94	45.10	24.80	14.40	11.70	4.00
fall dry	bog	37.30	335.09	3.90	1.85	1.63	0.93	44.60	25.20	14.80	11.60	3.70
fall dry	bog	35.53	366.32	4.48	1.89	1.66	0.94	45.40	24.40	14.50	11.70	4.00
fall dry	bog	34.29	339.51	4.30	1.88	1.72	0.93	45.90	24.60	14.70	10.80	4.00
fall dry	bog	33.15	316.16	4.14	1.81	1.61	0.93	44.90	25.10	15.30	10.40	4.30
drought	forest	20.17	222.29	4.78	1.72
drought	forest		260.70		1.72	1.55	0.92	43.00	30.00	16.00	6.00	5.00
drought	forest	23.26	222.38	4.15	1.73
drought	forest	24.72	297.43	5.22	1.77	1.60	0.94	42.00	30.00	15.00	8.00	4.00
drought	forest		237.44		1.75	1.51	0.93	42.00	30.00	14.00	10.00	4.00
drought	forest	27.00	258.97	4.16	1.75
drought	forest		276.13		1.74
drought	forest	30.15	299.85	4.32	1.77
drought	forest		342.57		1.79
drought	forest	28.89	311.37	4.68	1.83
drought	forest	31.63	344.18	4.73	1.83	1.66	0.93	42.00	28.00	16.00	9.00	5.00
drought	forest		305.15		1.81
drought	forest	30.77	345.33	4.87	1.80	1.57	0.92	43.00	28.00	15.00	8.00	5.00
drought	forest		319.20		1.81
drought	forest	32.81	282.23	3.74	1.81	1.63	0.95	43.00	29.00	14.00	10.00	3.00
drought	forest		343.15		1.76
drought	forest	33.76	329.21	4.23	1.77	1.65	0.95	44.00	29.00	17.00	6.00	4.00
drought	forest	32.13	300.66	4.06	1.92	1.62	0.94	46.00	26.00	17.00	7.00	5.00
drought	forest	36.89	354.20	4.17	1.89
drought	forest	37.26	338.96	3.95	1.89	1.62	0.95	45.00	27.00	17.00	8.00	3.00
drought	forest	35.20	364.80	4.50	1.87
drought	forest	34.68	303.44	3.80	1.88	1.58	0.93	44.00	27.00	14.00	12.00	4.00
drought	forest	32.98	326.24	4.30	1.88
drought	forest	40.35	404.04	4.35	1.96	1.60	0.92	44.00	27.00	18.00	7.00	5.00
drought	forest	36.15	343.52	4.13	1.95	1.65	0.93	44.00	27.00	16.00	8.00	4.00
drought	forest	33.71	335.09	4.32	1.96
drought	forest	35.51	349.04	4.27	1.94	1.68	0.92	45.00	25.00	16.00	9.00	5.00
drought	forest
drought	forest	33.95	327.35	4.19	1.90	1.75	0.92	45.00	25.00	13.00	12.00	5.00
drought	forest
drought	forest	35.40	357.89	4.39	1.94
drought	bog	21.62	237.95	4.78	1.75
drought	bog	22.40	245.50	4.76	1.73	1.57	0.90	43.00	28.00	13.00	10.00	6.00
drought	bog	24.98	266.23	4.63	1.76	1.54	0.91	43.00	28.00	13.00	11.00	6.00
drought	bog	28.49	282.72	4.31	1.84
drought	bog	26.41	290.41	4.77	1.84	1.62	0.92	44.00	26.00	14.00	11.00	5.00
drought	bog		281.77		1.81
drought	bog	27.74	301.12	4.71	1.78	1.52	0.93	44.00	27.00	13.00	11.00	5.00
drought	bog		258.05		1.83
drought	bog	28.78	293.63	4.43	1.83	1.54	0.92	43.00	27.00	12.00	13.00	5.00
drought	bog	36.60	384.14	4.56	1.80
drought	bog	32.45	331.08	4.43	2.00
drought	bog	33.16	311.04	4.07	1.91	1.60	0.93	45.00	24.00	14.00	12.00	5.00
drought	bog
drought	bog	32.98	309.94	4.08	1.93	1.52	0.93	45.00	25.00	12.00	13.00	5.00
