# Supplementary material for: Changes in dissolved organic matter quality in a peatland and forest headwater stream as a function of seasonality and hydrologic conditions
Source: Copernicus journal article supplement (doi:10.5194/hess-21-2035-2017), 2017-04-13
Supplement: Supplementary file 1 [file hess-21-2035-2017-supplement.zip › hess-21-2035-2017-supplement-title-page.pdf]

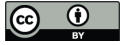

## *Supplement of*

# **Changes in dissolved organic matter quality in a peatland and forest headwater stream as a function of seasonality and hydrologic conditions**

**Tanja Broder et al.**

*Correspondence to:* Tanja Broder (broder@uni-muenster.de)

- hess-21-2035-2017-supplement-title-page.pdf
- data\_Broder.csv
- data\_Broder\_event.csv
- supplement.pdf

The copyright of individual parts of the supplement might differ from the CC-BY 3.0 licence.
