# Supplementary material for: Changes in dissolved organic matter quality in a peatland and forest headwater stream as a function of seasonality and hydrologic conditions
Source: Copernicus journal article supplement (doi:10.5194/hess-21-2035-2017), 2017-04-13
Supplement: Supplementary file 1 [file hess-21-2035-2017-supplement.zip › supplement.pdf]

Table S1: General descriptive statistics (mean, median, standard deviation (SD), minimum and maximum values) for DOC concentrations, and DOM quality parameters (abs<sub>254nm</sub>, SUVA, S<sub>R</sub>, FI, HIX, C1%, C2%, C3%, C4% and C5%) for each sampled event.

| DOC     | Snowmelt |        | spring dry |        | spring wet |        | fall dry |        |
|---------|----------|--------|------------|--------|------------|--------|----------|--------|
|         | bog      | forest | bog        | forest | bog        | forest | bog      | forest |
| N       | 5        | 5      | 13         | 24     | 21         | 23     | 18       | 25     |
| mean    | 5.9      | 11.0   | 24.3       | 27.0   | 12.9       | 20.7   | 34.5     | 39.1   |
| median  | 5.1      | 11.2   | 23.6       | 26.5   | 12.8       | 21.3   | 34.4     | 39.4   |
| SD      | 1.3      | 0.6    | 1.7        | 1.7    | 2.1        | 1.9    | 1.9      | 4.2    |
| Minimum | 5.0      | 10.2   | 21.9       | 23.6   | 9.4        | 17.9   | 30.2     | 32.2   |
| Maximum | 7.9      | 11.7   | 26.8       | 31.7   | 18.4       | 23.1   | 37.3     | 45.8   |

| Abs     | Snowmelt |        | spring dry |        | spring wet |        | fall dry |        |
|---------|----------|--------|------------|--------|------------|--------|----------|--------|
|         | bog      | forest | bog        | forest | bog        | forest | bog      | forest |
| N       | 5        | 7      | 12         | 23     | 21         | 23     | 18       | 25     |
| mean    | 58       | 112    | 256        | 309    | 138        | 244    | 337      | 377    |
| median  | 49       | 113    | 252        | 310    | 135        | 248    | 338      | 376    |
| SD      | 15       | 10     | 21         | 14     | 23         | 24     | 18       | 52     |
| Minimum | 45       | 97     | 225        | 272    | 102        | 203    | 289      | 284    |
| Maximum | 80       | 128    | 290        | 341    | 203        | 281    | 366      | 489    |

| SUVA    | Snowmelt |        | spring dry |        | spring wet |        | fall dry |        |
|---------|----------|--------|------------|--------|------------|--------|----------|--------|
|         | bog      | forest | bog        | forest | bog        | forest | bog      | forest |
| N       | 5        | 5      | 12         | 23     | 21         | 23     | 18       | 25     |
| mean    | 4.2      | 4.3    | 4.5        | 5.0    | 4.6        | 5.1    | 4.3      | 4.2    |
| median  | 4.3      | 4.2    | 4.6        | 5.0    | 4.6        | 5.1    | 4.2      | 4.3    |
| SD      | 0.2      | 0.1    | 0.1        | 0.2    | 0.1        | 0.2    | 0.2      | 0.3    |
| Minimum | 3.9      | 4.2    | 4.2        | 4.6    | 4.3        | 4.6    | 3.9      | 3.1    |
| Maximum | 4.4      | 4.5    | 4.7        | 5.2    | 5.0        | 5.5    | 4.6      | 4.6    |

| S <sub>R</sub> | Snowmelt |        | spring dry |        | spring wet |        | fall dry |        |
|----------------|----------|--------|------------|--------|------------|--------|----------|--------|
|                | bog      | forest | bog        | forest | bog        | forest | bog      | forest |
| N              | 5        | 7      | 12         | 23     | 21         | 23     | 18       | 25     |
| mean           | 1.83     | 2.02   | 1.77       | 1.80   | 1.66       | 1.83   | 1.89     | 1.90   |
| median         | 1.83     | 2.01   | 1.74       | 1.79   | 1.66       | 1.85   | 1.88     | 1.90   |
| SD             | 0.04     | 0.07   | 0.07       | 0.04   | 0.03       | 0.06   | 0.05     | 0.04   |

|         |      |      |      |      |      |      |      |      |
|---------|------|------|------|------|------|------|------|------|
| Minimum | 1.78 | 1.96 | 1.70 | 1.75 | 1.58 | 1.68 | 1.81 | 1.80 |
| Maximum | 1.88 | 2.17 | 1.90 | 1.88 | 1.72 | 1.88 | 1.95 | 1.99 |

| FI      | Snowmelt |        | spring dry |        | spring wet |        | fall dry |        |
|---------|----------|--------|------------|--------|------------|--------|----------|--------|
|         | bog      | forest | bog        | forest | bog        | forest | bog      | forest |
| N       | 5        | 7      | 10         | 11     | 13         | 13     | 17       | 18     |
| mean    | 1.61     | 1.67   | 1.61       | 1.62   | 1.57       | 1.61   | 1.63     | 1.65   |
| median  | 1.60     | 1.67   | 1.62       | 1.62   | 1.57       | 1.62   | 1.63     | 1.65   |
| SD      | 0.05     | 0.02   | 0.04       | 0.03   | 0.04       | 0.04   | 0.05     | 0.04   |
| Minimum | 1.54     | 1.64   | 1.54       | 1.58   | 1.53       | 1.54   | 1.55     | 1.59   |
| Maximum | 1.67     | 1.70   | 1.66       | 1.66   | 1.69       | 1.68   | 1.72     | 1.73   |

| HIX     | Snowmelt |        | spring dry |        | spring wet |        | fall dry |        |
|---------|----------|--------|------------|--------|------------|--------|----------|--------|
|         | Bog      | forest | bog        | forest | bog        | forest | bog      | forest |
| N       | 5        | 7      | 10         | 11     | 13         | 13     | 17       | 18     |
| mean    | 0.83     | 0.87   | 0.92       | 0.91   | 0.85       | 0.91   | 0.93     | 0.93   |
| median  | 0.81     | 0.87   | 0.91       | 0.91   | 0.84       | 0.90   | 0.93     | 0.93   |
| SD      | 0.05     | 0.04   | 0.02       | 0.03   | 0.02       | 0.03   | 0.01     | 0.01   |
| Minimum | 0.76     | 0.81   | 0.88       | 0.85   | 0.82       | 0.87   | 0.92     | 0.91   |
| Maximum | 0.91     | 0.93   | 0.95       | 0.94   | 0.89       | 0.95   | 0.94     | 0.96   |

| C1      | Snowmelt |        | spring dry |        | spring wet |        | fall dry |        |
|---------|----------|--------|------------|--------|------------|--------|----------|--------|
|         | Bog      | forest | bog        | forest | bog        | forest | bog      | forest |
| N       | 5        | 7      | 10         | 11     | 13         | 13     | 17       | 18     |
| mean    | 44       | 43     | 44         | 43     | 42         | 42     | 45       | 44     |
| median  | 44       | 43     | 43         | 43     | 42         | 42     | 45       | 44     |
| SD      | 2        | 1      | 1          | 1      | 1          | 1      | 1        | 1      |
| Minimum | 41       | 42     | 42         | 42     | 41         | 41     | 44       | 42     |
| Maximum | 47       | 45     | 46         | 44     | 43         | 43     | 46       | 46     |

| C2      | Snowmelt |        | spring dry |        | spring wet |        | fall dry |        |
|---------|----------|--------|------------|--------|------------|--------|----------|--------|
|         | Bog      | Forest | bog        | forest | bog        | forest | bog      | forest |
| N       | 5        | 7      | 10         | 11     | 13         | 13     | 17       | 18     |
| mean    | 23       | 27     | 27         | 28     | 27         | 31     | 25       | 27     |
| median  | 23       | 27     | 27         | 29     | 27         | 31     | 25       | 27     |
| SD      | 1        | 1      | 1          | 2      | 1          | 1      | 1        | 1      |
| Minimum | 22       | 25     | 26         | 23     | 26         | 30     | 24       | 25     |
| Maximum | 26       | 28     | 29         | 30     | 30         | 31     | 26       | 28     |

| C3      | Snowmelt |        | spring dry |        | spring wet |        | drought |        | fall dry |        |
|---------|----------|--------|------------|--------|------------|--------|---------|--------|----------|--------|
|         | bog      | forest | bog        | forest | bog        | forest | bog     | forest | bog      | forest |
| N       | 5        | 7      | 10         | 11     | 13         | 13     | 7       | 14     | 17       | 18     |
| mean    | 14       | 21     | 14         | 17     | 15         | 19     | 13      | 16     | 14       | 16     |
| median  | 14       | 20     | 14         | 17     | 15         | 20     | 13      | 16     | 14       | 17     |
| SD      | 1        | 1      | 1          | 2      | 1          | 2      | 1       | 1      | 1        | 2      |
| Minimum | 13       | 20     | 13         | 13     | 14         | 16     | 12      | 13     | 12       | 13     |
| Maximum | 15       | 22     | 15         | 20     | 17         | 21     | 14      | 18     | 15       | 21     |

  

| C4      | Snowmelt |        | spring dry |        | spring wet |        | drought |        | fall dry |        |
|---------|----------|--------|------------|--------|------------|--------|---------|--------|----------|--------|
|         | Bog      | Forest | bog        | forest | bog        | forest | bog     | forest | bog      | forest |
| N       | 5        | 7      | 10         | 11     | 13         | 13     | 7       | 14     | 17       | 18     |
| mean    | 7        | 0      | 9          | 5      | 7          | 1      | 12      | 9      | 12       | 8      |
| median  | 7        | 0      | 9          | 6      | 7          | 0      | 11      | 8      | 12       | 8      |
| SD      | 2        | 0      | 1          | 2      | 1          | 2      | 1       | 2      | 1        | 3      |
| Minimum | 4        | 0      | 8          | 3      | 6          | 0      | 10      | 6      | 10       | 4      |
| Maximum | 9        | 0      | 11         | 9      | 8          | 6      | 13      | 12     | 14       | 13     |

  

| C5      | Snowmelt |        | spring dry |        | spring wet |        | drought |        | fall dry |        |
|---------|----------|--------|------------|--------|------------|--------|---------|--------|----------|--------|
|         | bog      | forest | bog        | forest | bog        | forest | bog     | forest | bog      | forest |
| N       | 5        | 7      | 10         | 11     | 13         | 13     | 7       | 14     | 17       | 18     |
| mean    | 12       | 9      | 6          | 6      | 9          | 7      | 5       | 4      | 4        | 5      |
| median  | 12       | 9      | 6          | 6      | 10         | 7      | 5       | 5      | 4        | 5      |
| SD      | 3        | 2      | 1          | 2      | 1          | 1      | 0       | 1      | 0        | 1      |
| Minimum | 9        | 7      | 4          | 5      | 7          | 5      | 5       | 3      | 4        | 3      |
| Maximum | 16       | 12     | 8          | 13     | 11         | 8      | 6       | 5      | 5        | 6      |
